# Supplementary material for: Synthesis of 13C-methyl-labeled amino acids and their incorporation into proteins in mammalian cells
Source: Royal Society of Chemistry journal article supplement (doi:10.1039/d3ob01320k), 2023-01-01

## Supporting Information

### **Synthesis of $^{13}\text{C}$ -methyl-labeled amino acids and their incorporation into proteins in mammalian cells**

Matteo Borgini,<sup>1,3</sup> Łukasz Wieteska,<sup>2,4</sup> Cynthia S. Hinck,<sup>2</sup> Troy Krzysiak,<sup>2</sup> Andrew P. Hinck,<sup>2,\*</sup> and Peter Wipf<sup>1,\*</sup>

<sup>1</sup>Department of Chemistry, University of Pittsburgh, Pittsburgh, PA 15260, U.S.A.

<sup>2</sup>Department of Structural Biology, University of Pittsburgh, Pittsburgh, PA 15260, U.S.A.

<sup>3</sup>Current Address: Department of Chemistry and Biochemistry, Augusta University, Augusta, GA 30912, USA

<sup>4</sup>Current Address: Francis Crick Institute, London, NW1 1AT, U.K.

|                                                       |        |
|-------------------------------------------------------|--------|
| Figure 1S.....                                        | Page 2 |
| Spectra ( $^1\text{H}$ NMR, $^{13}\text{C}$ NMR)..... | Page 3 |

Figure 1S

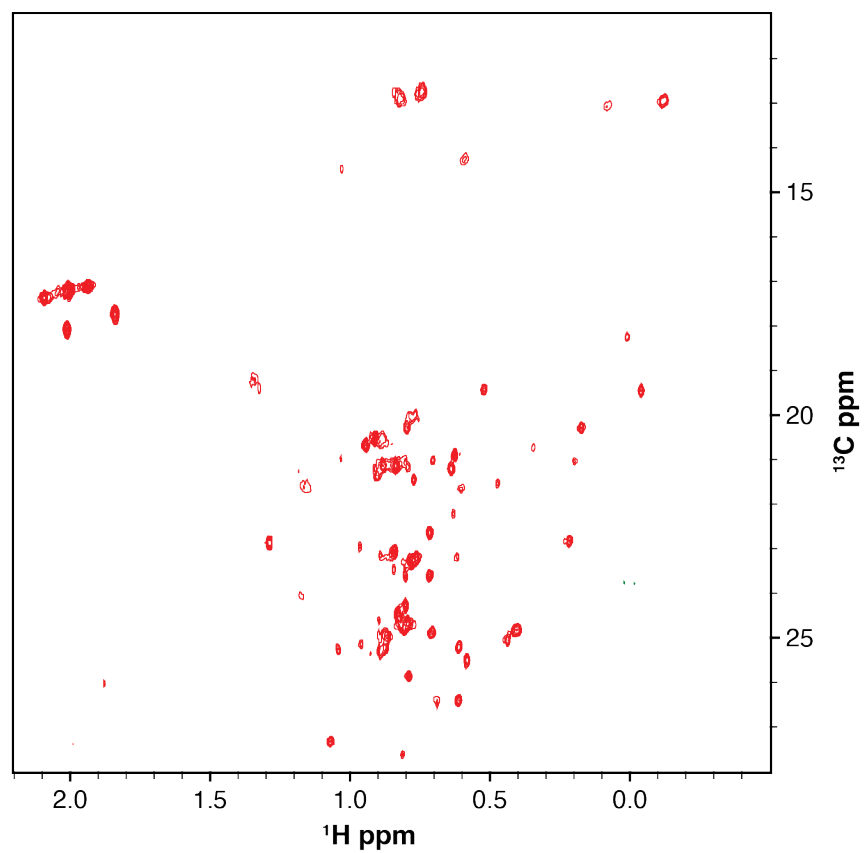

**Figure 1S.** BG<sub>ZPC</sub> ILVM  $^1\text{H}$ - $^{13}\text{C}$  HSQC spectrum. Sample was produced in *E. coli* and spectrum was recorded at 900 MHz with a sweep width of 4075 Hz and 113 complex points in the  $^{13}\text{C}$ -dimension.

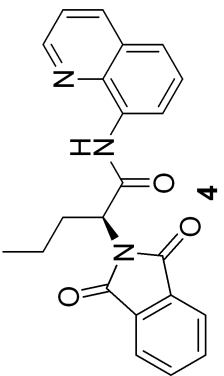

<sup>1</sup>H NMR (500 MHz, Chloroform-d)

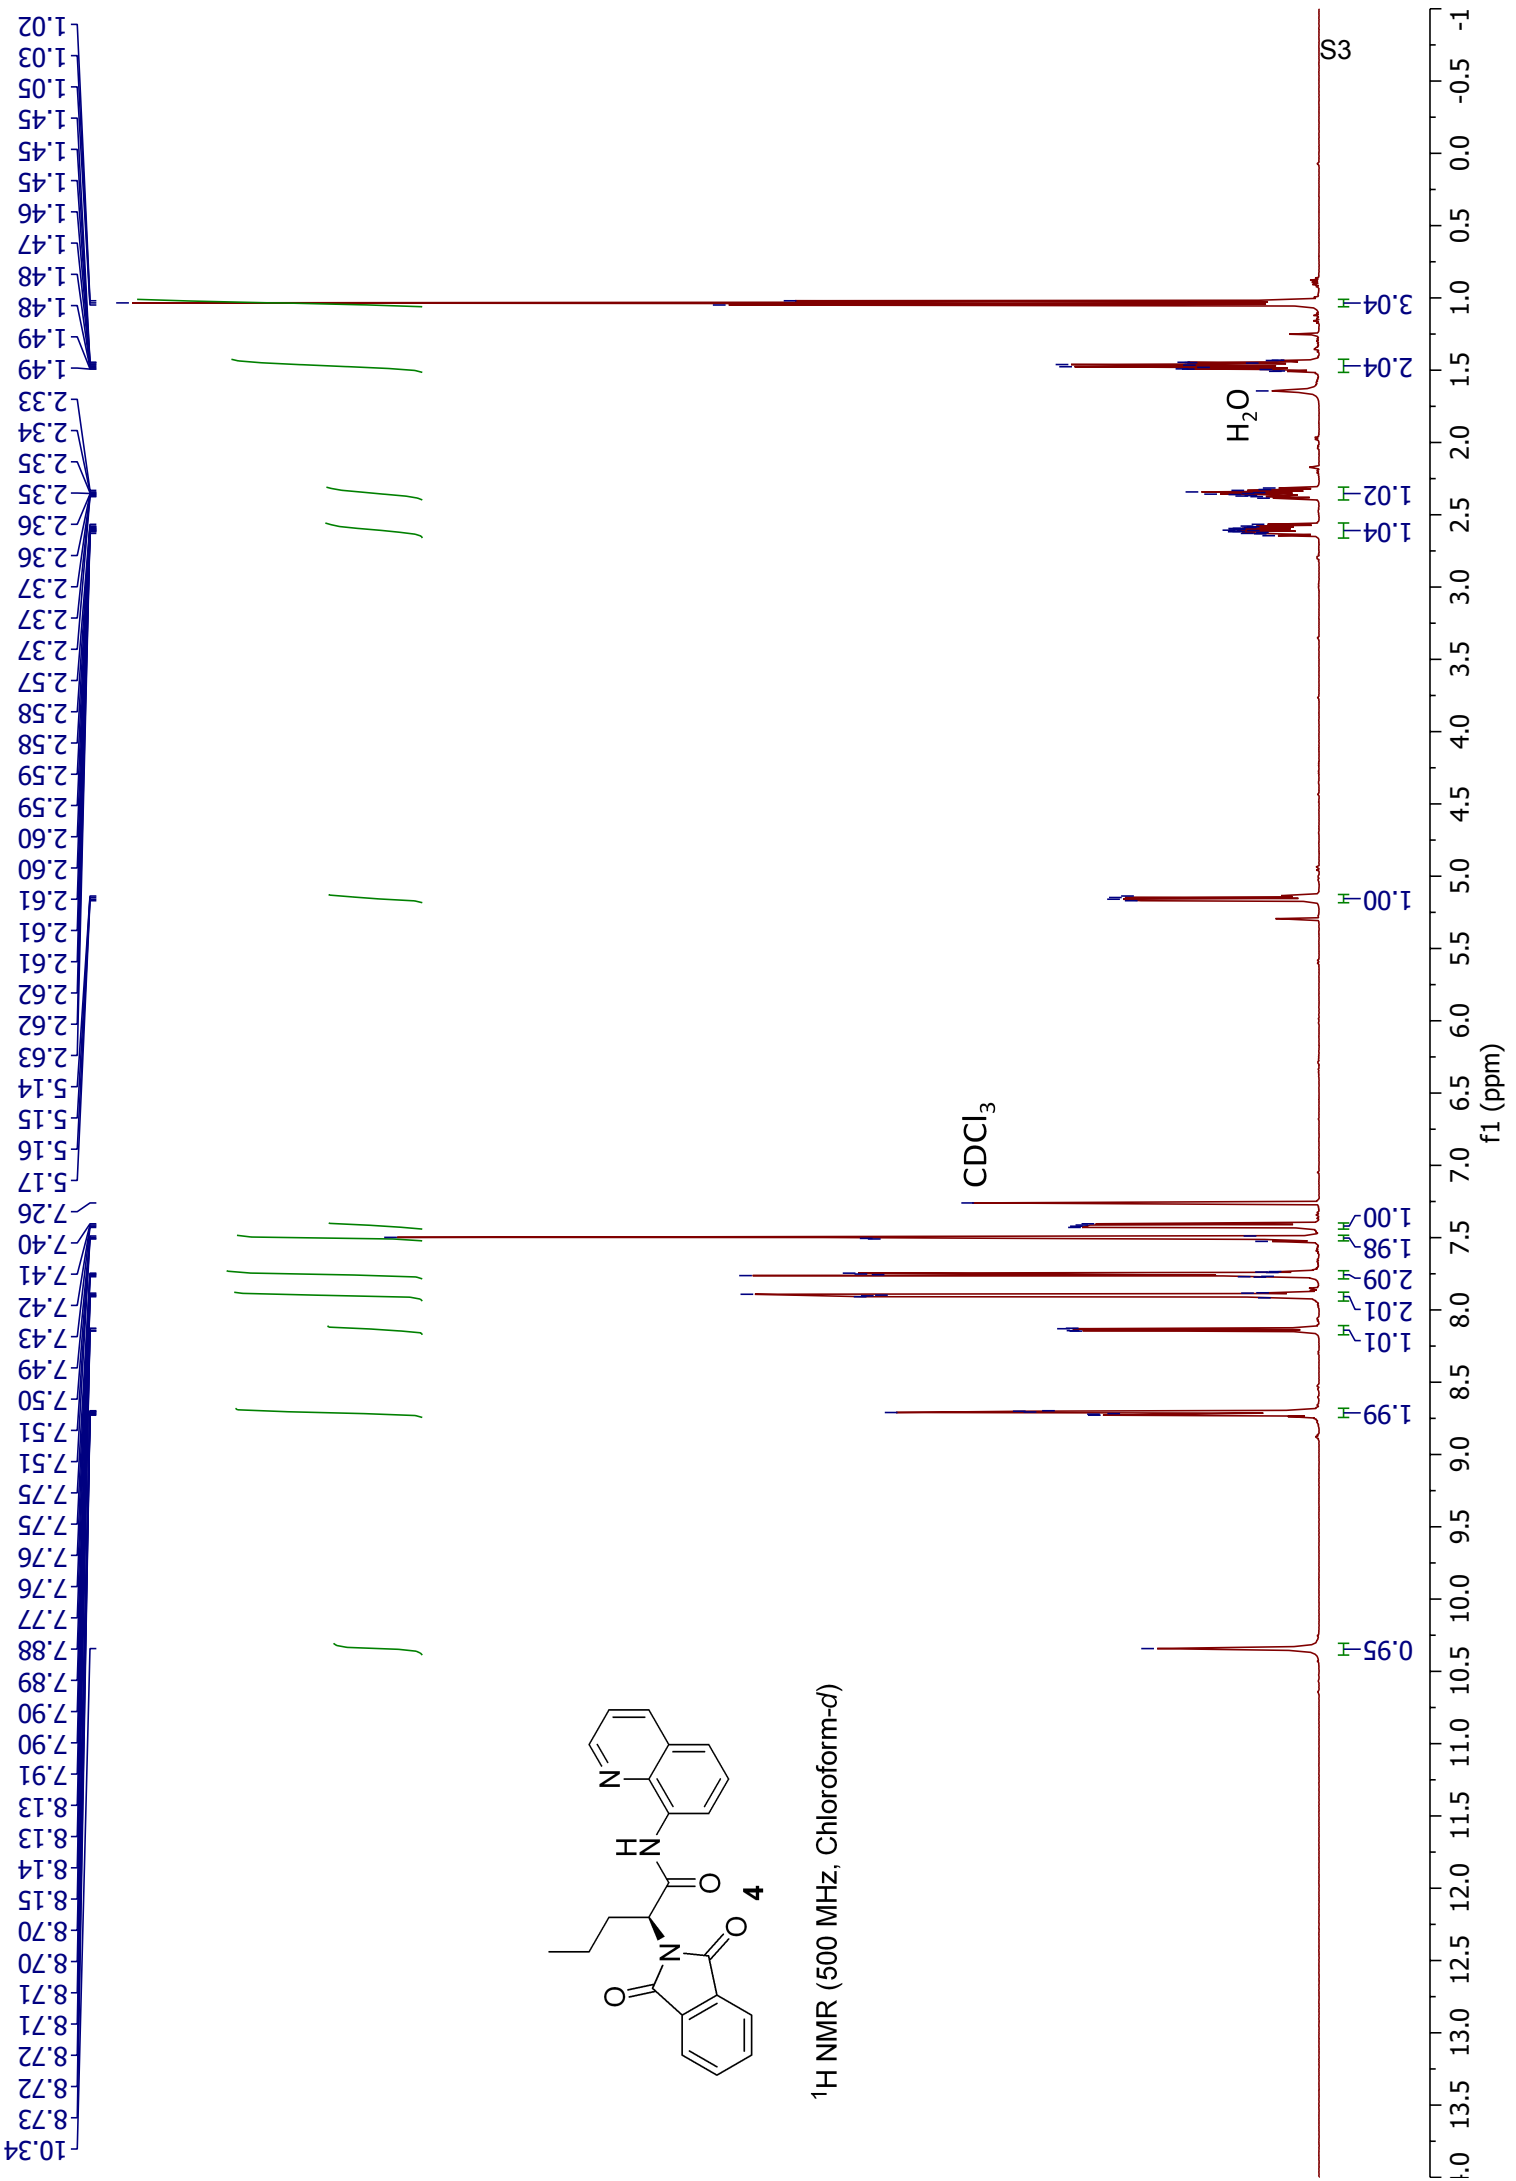



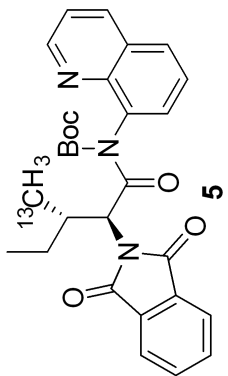

5

<sup>13</sup>C NMR (151 MHz, Chloroform-d)

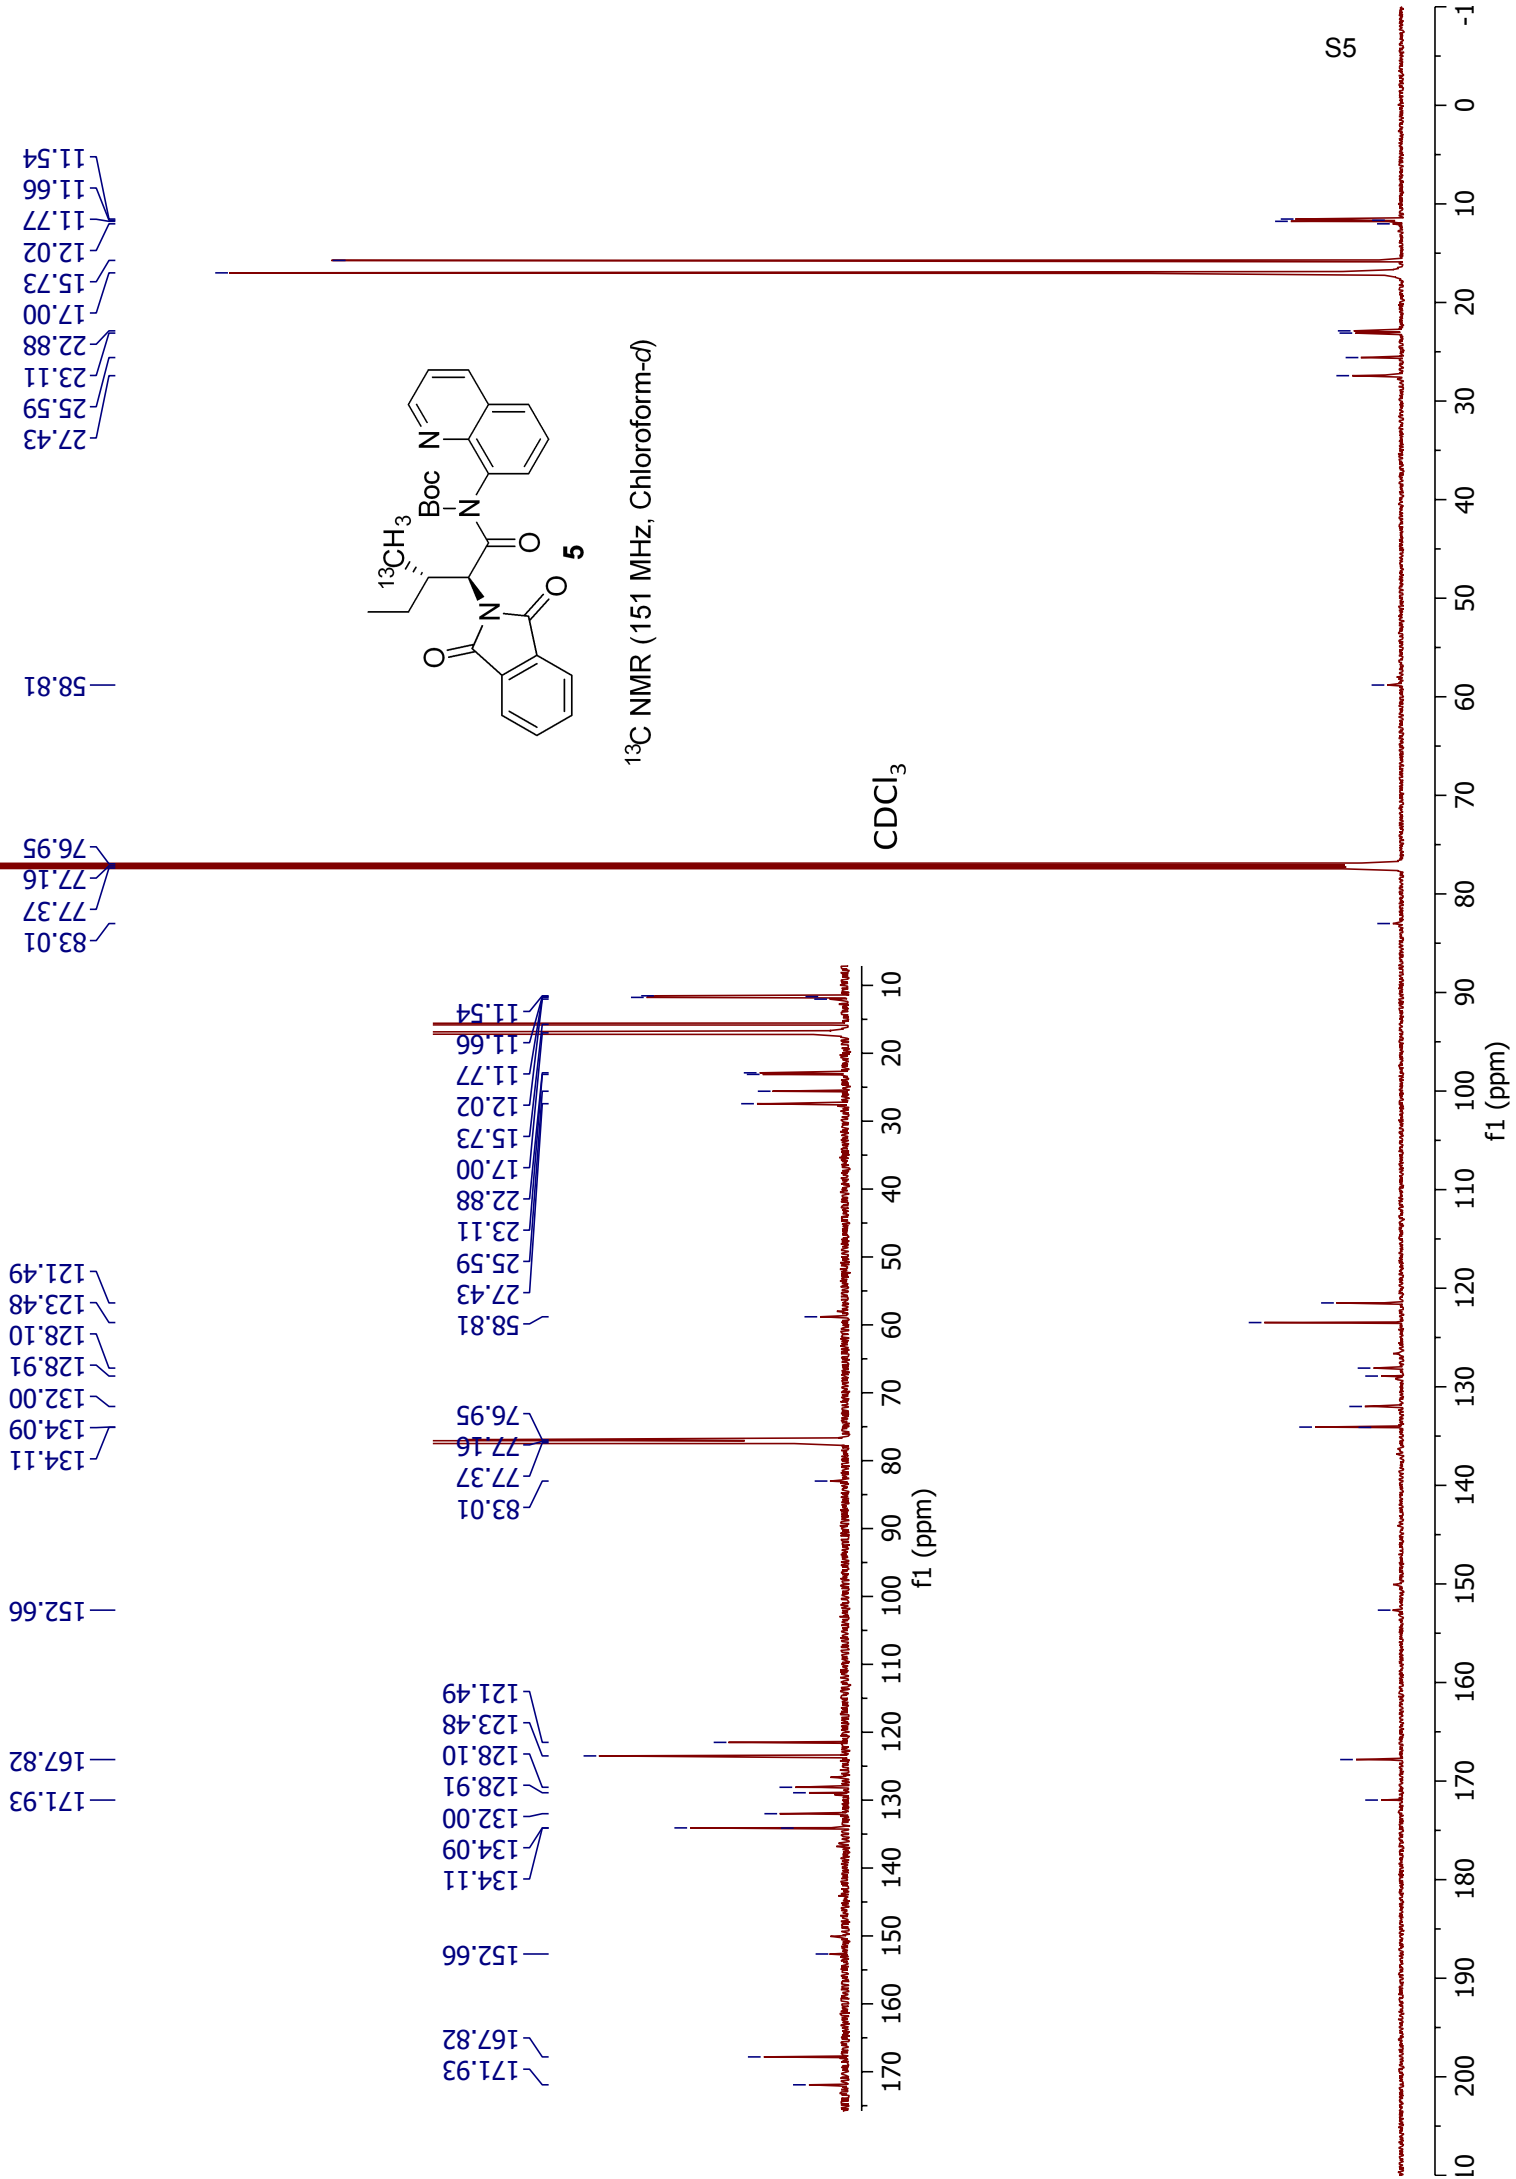

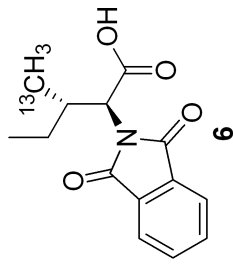

$^1\text{H}$  NMR (400 MHz, Chloroform-*d*, 60 °C)

Diastereomeric ratio trans/cis = 4:1

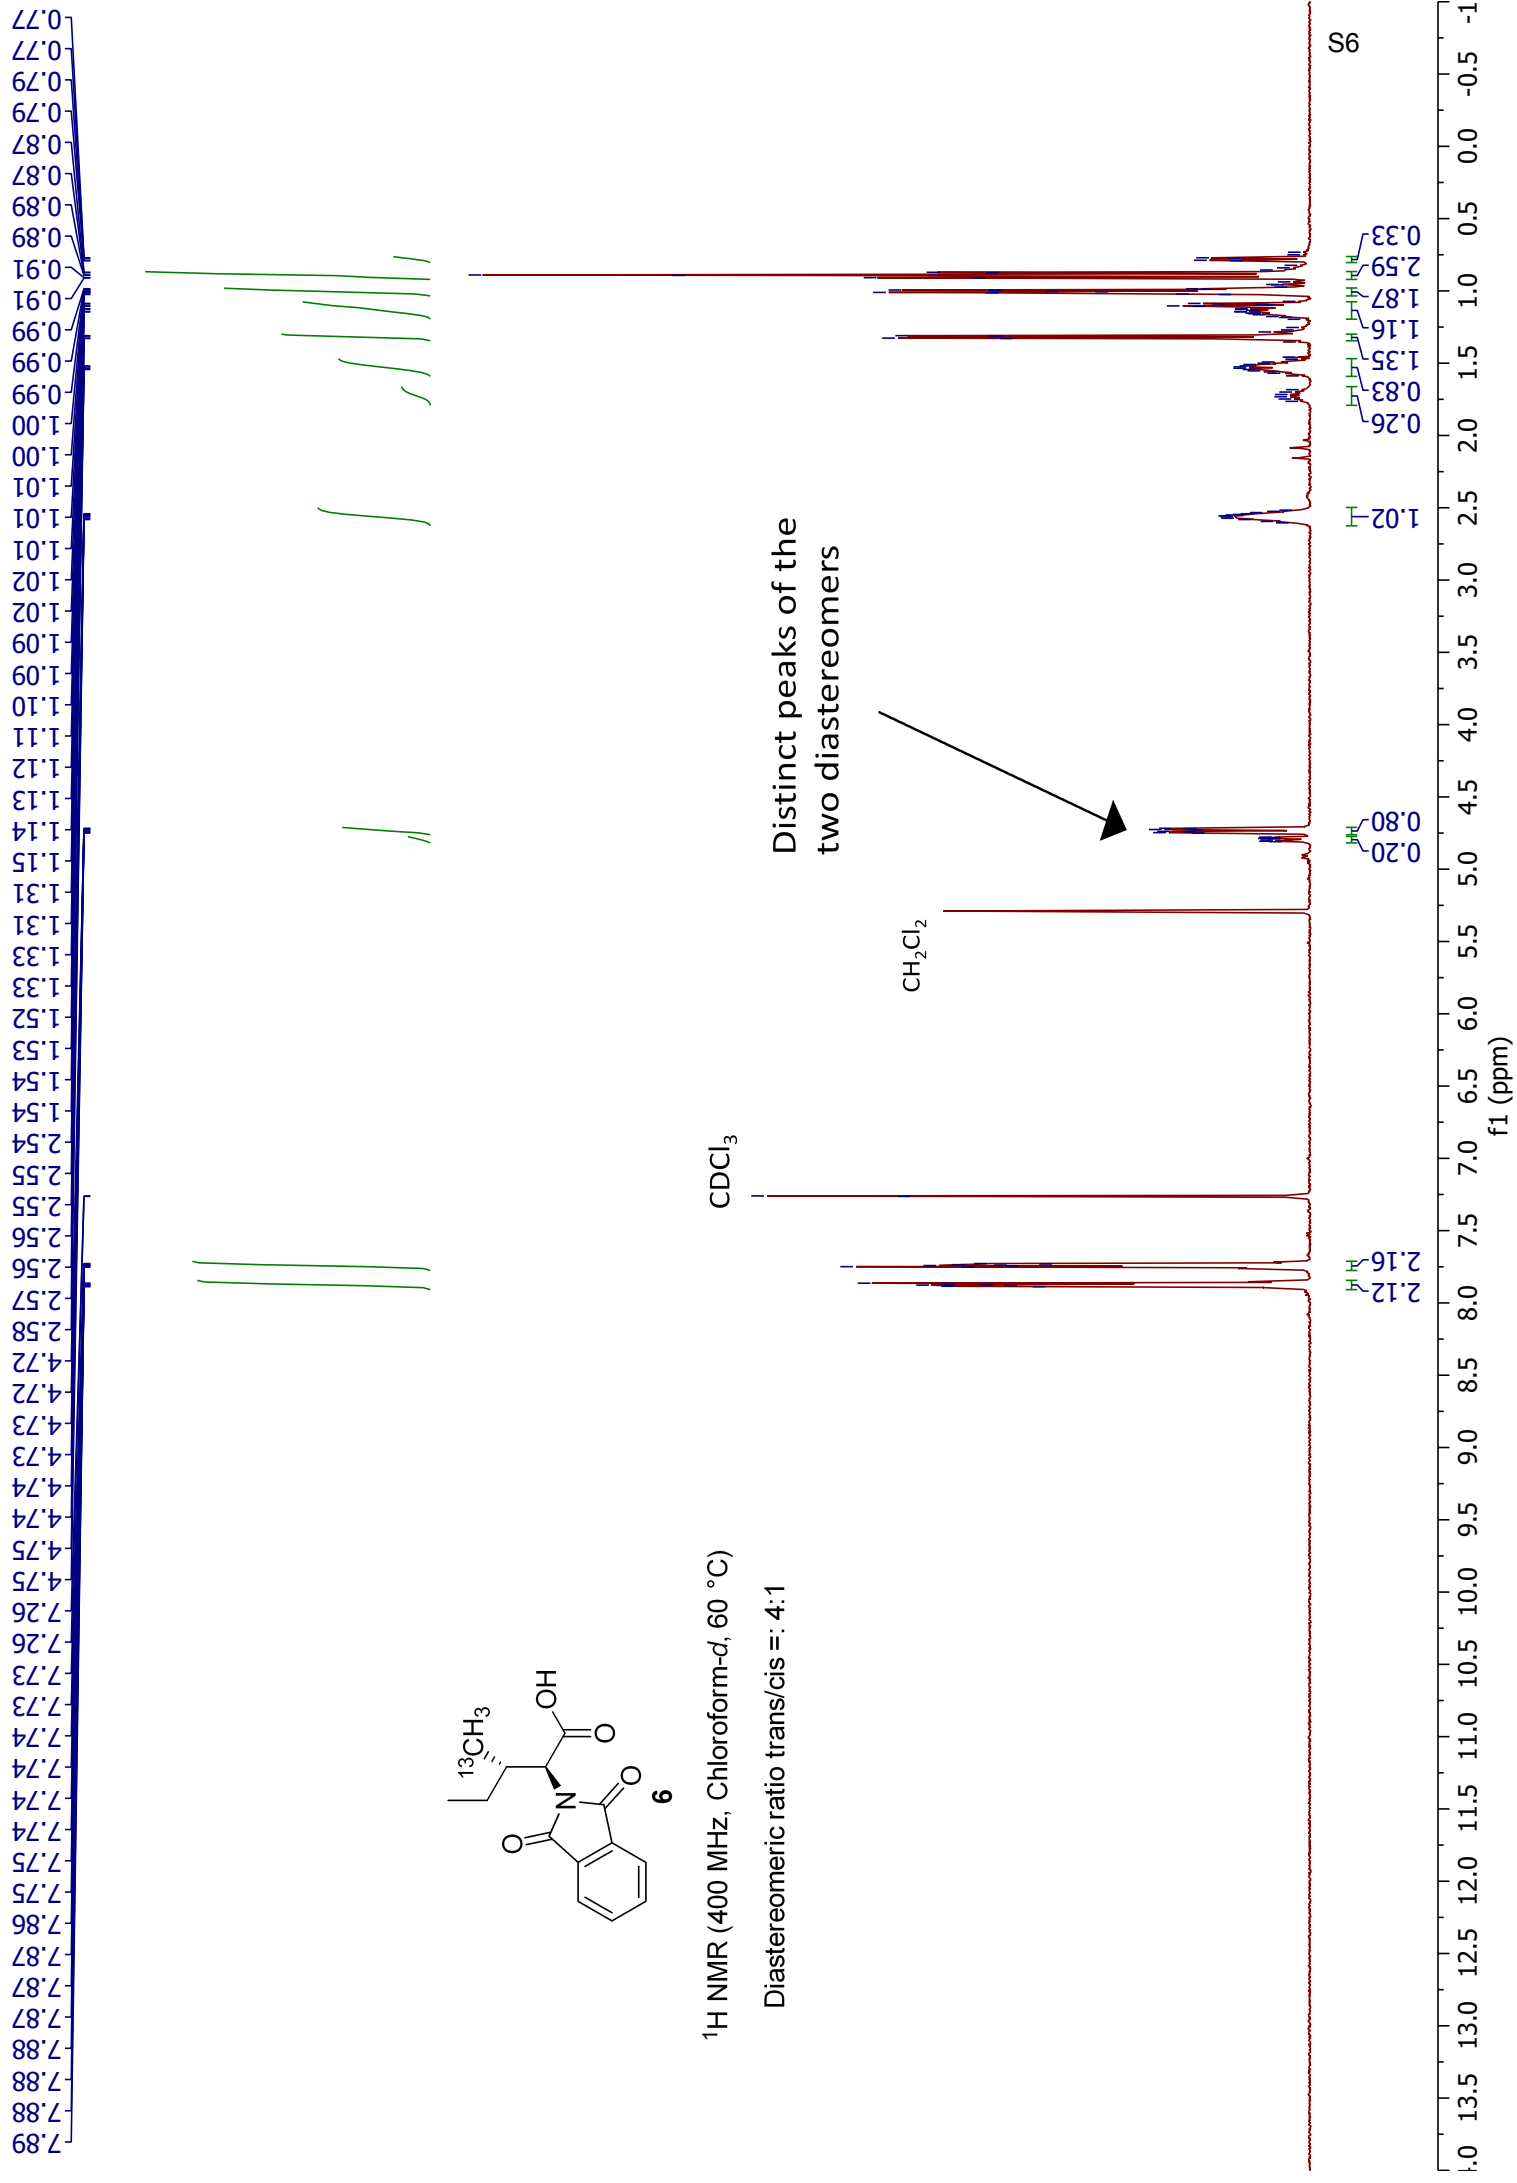

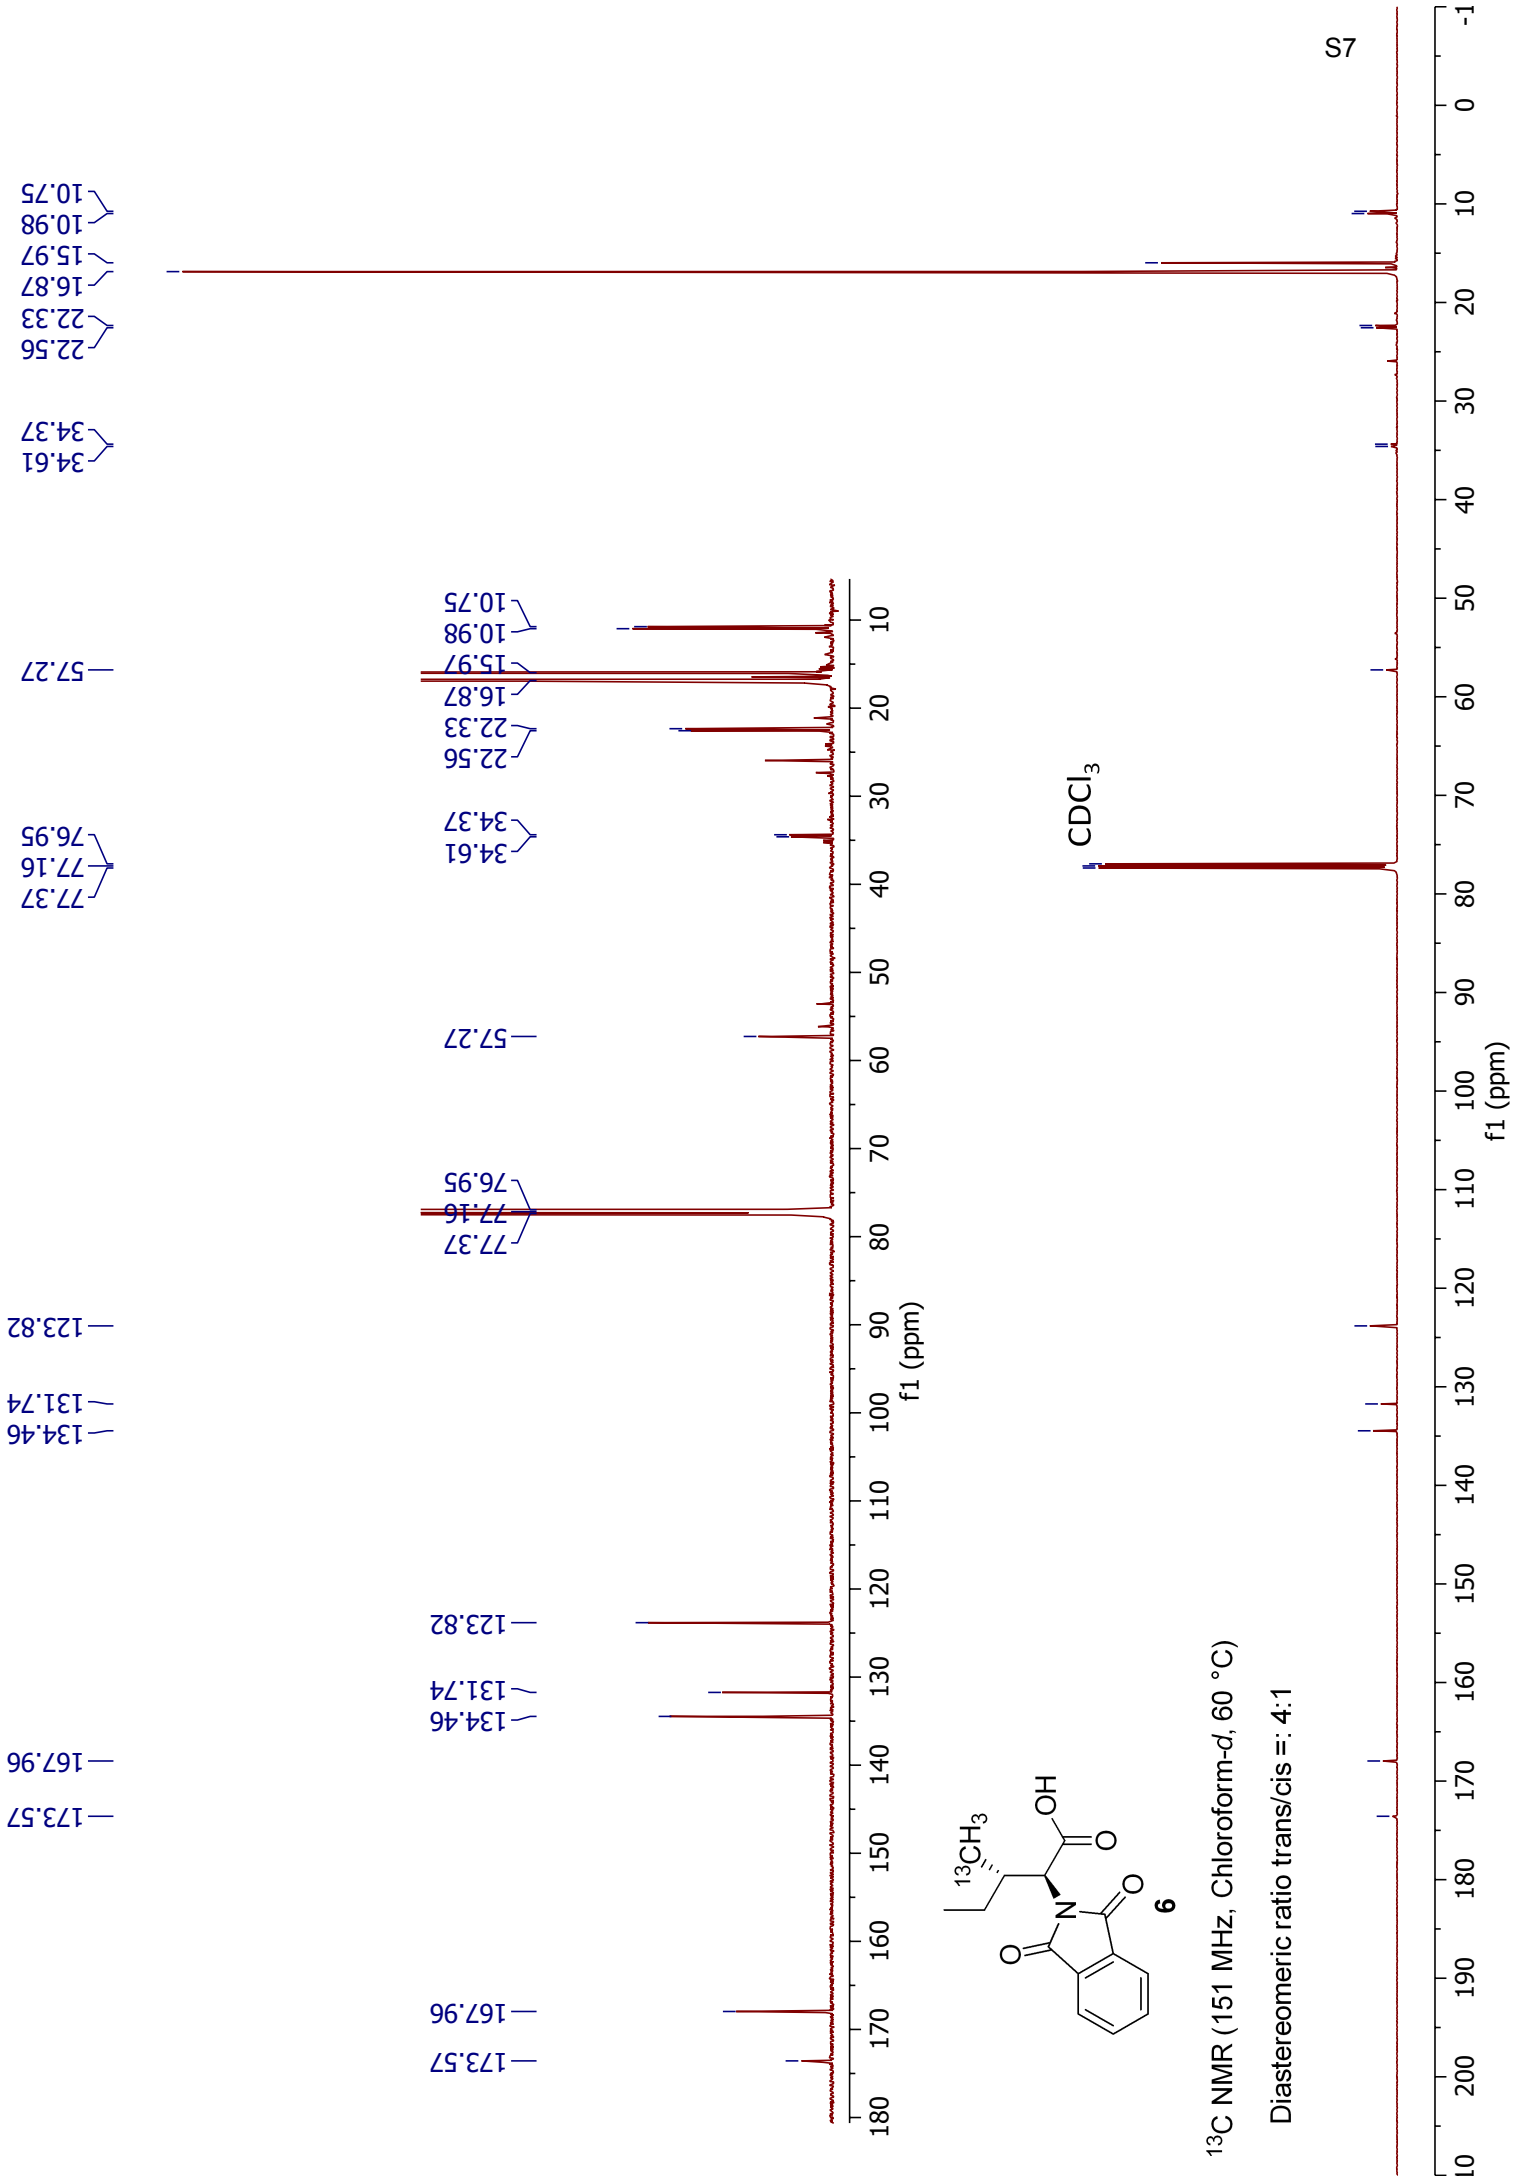

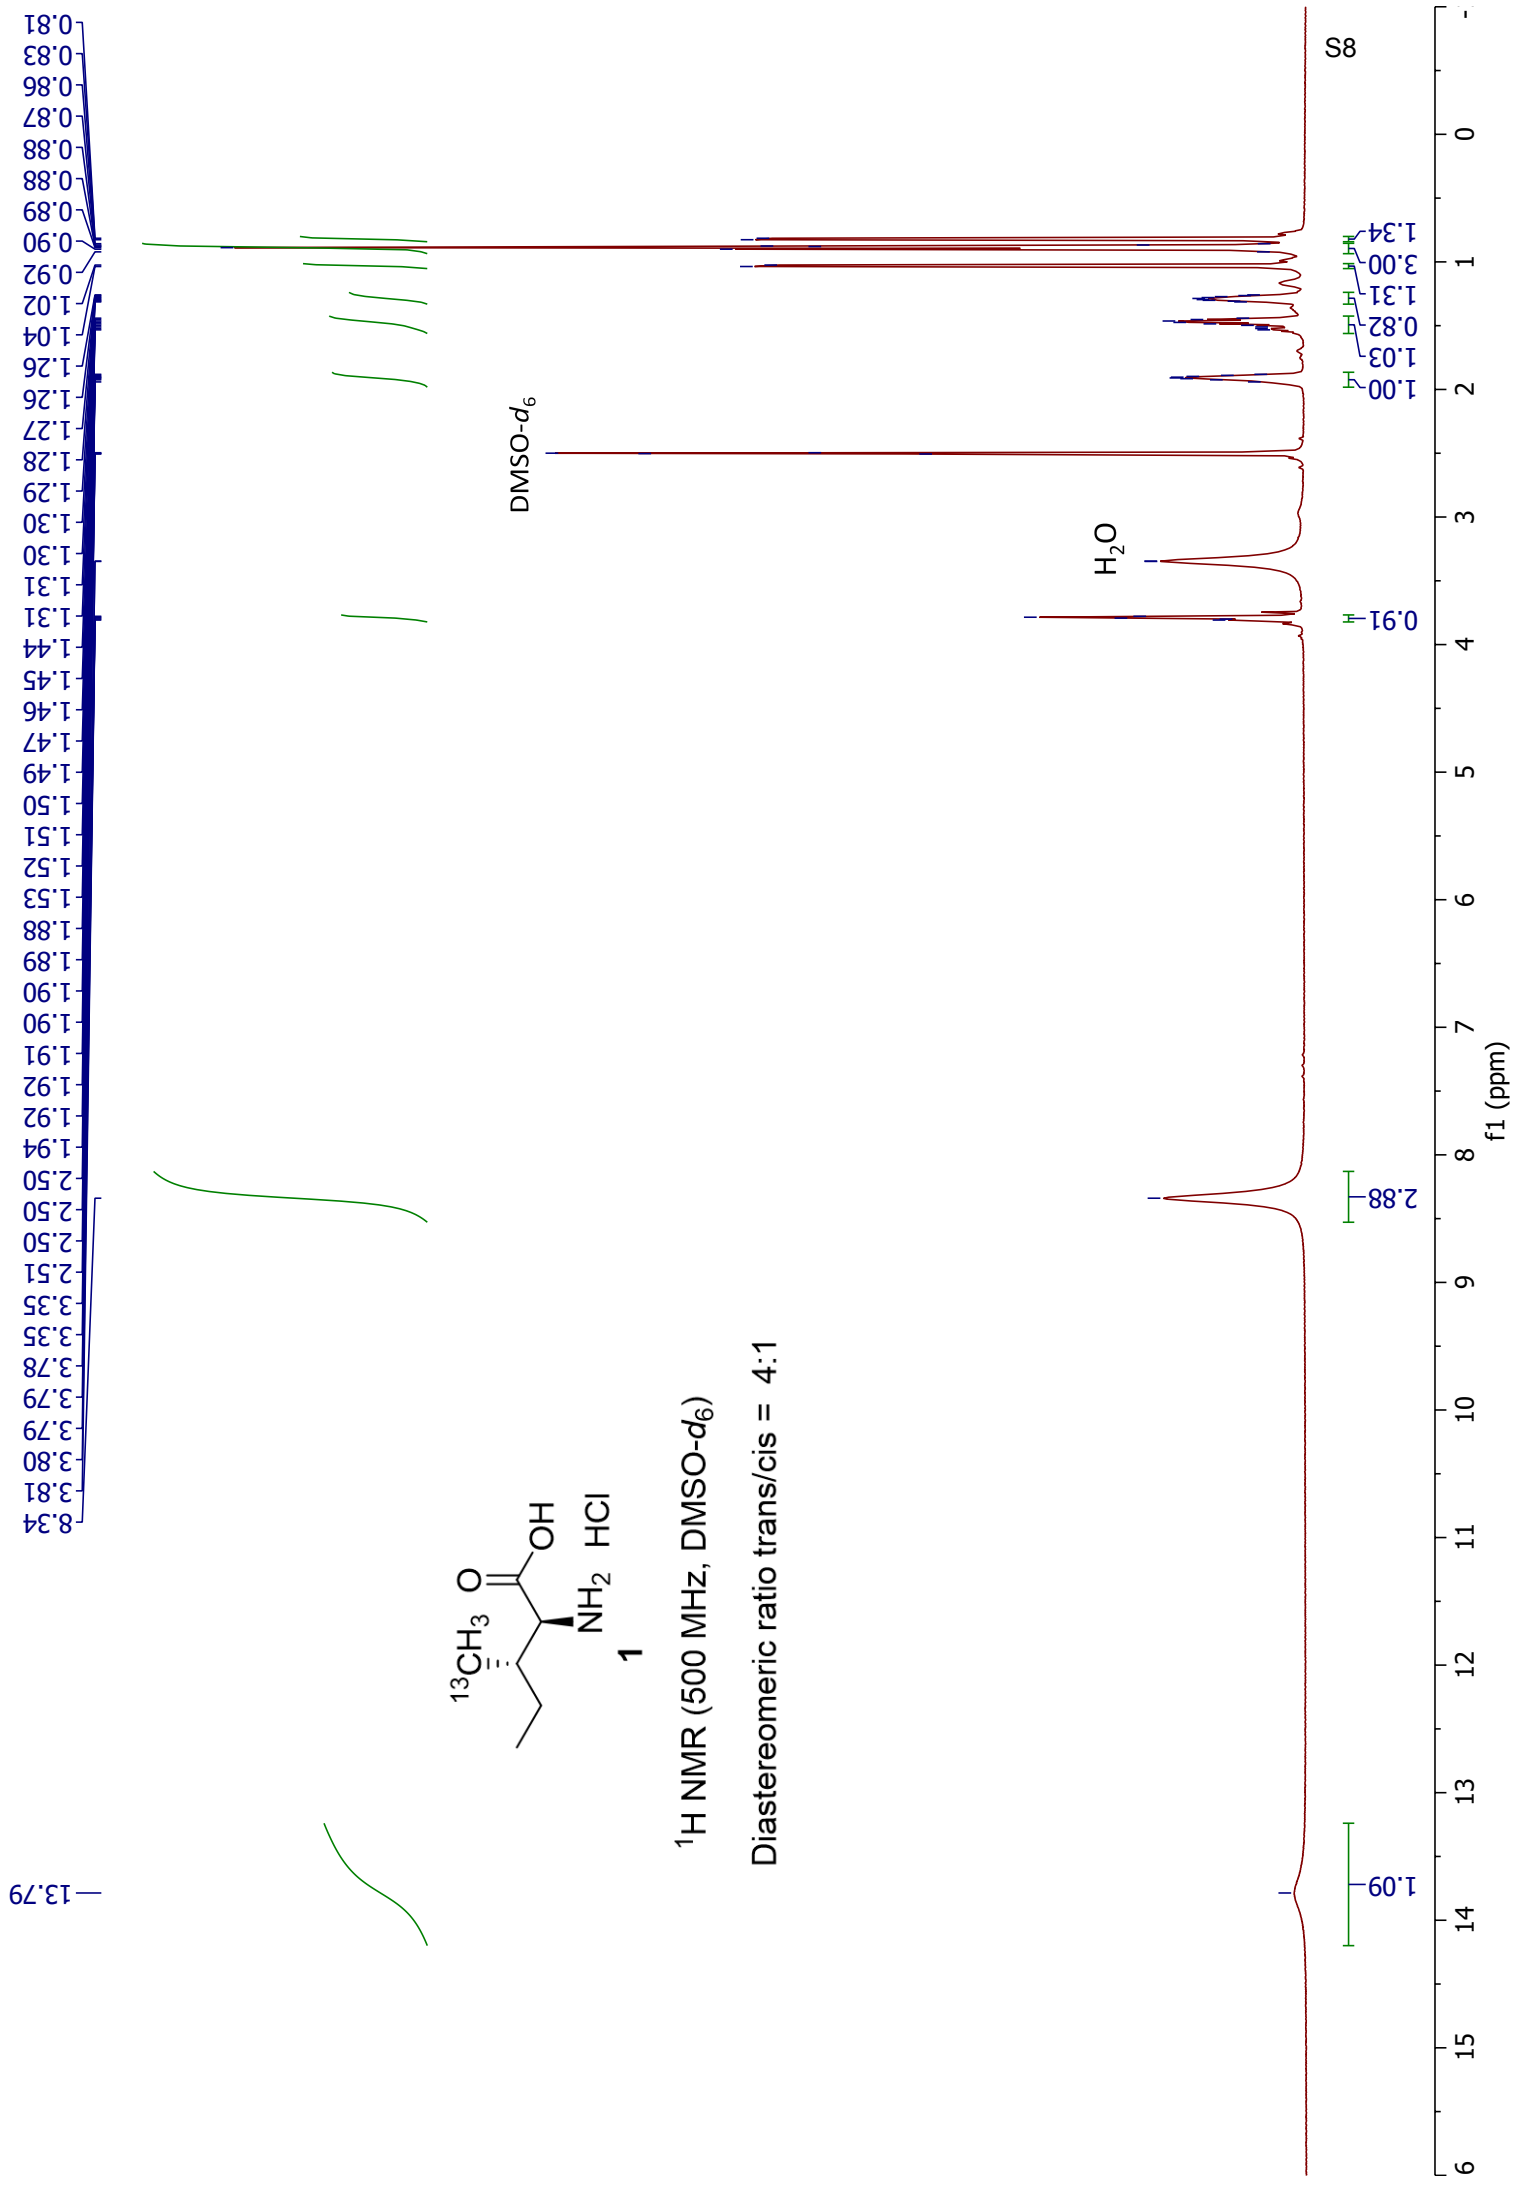



170.60  
170.14

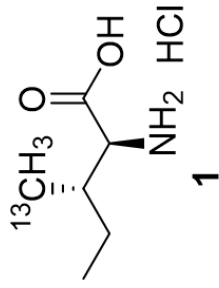

170.60  
170.14

<sup>13</sup>C NMR (126 MHz, DMSO-d<sub>6</sub>)

Diastereomeric ratio trans/cis = 4:1

56.08  
39.94  
39.80  
39.66  
39.52  
39.38  
39.24  
39.10  
35.79  
35.57  
25.19  
21.70  
21.47  
14.42  
14.35  
11.59  
11.57  
11.34

DMSO-d<sub>6</sub>

56.08  
39.94  
39.80  
39.66  
39.52  
39.38  
39.24  
39.10  
35.79  
35.57  
25.19  
21.70  
21.47  
14.42  
14.35  
11.59  
11.57  
11.34

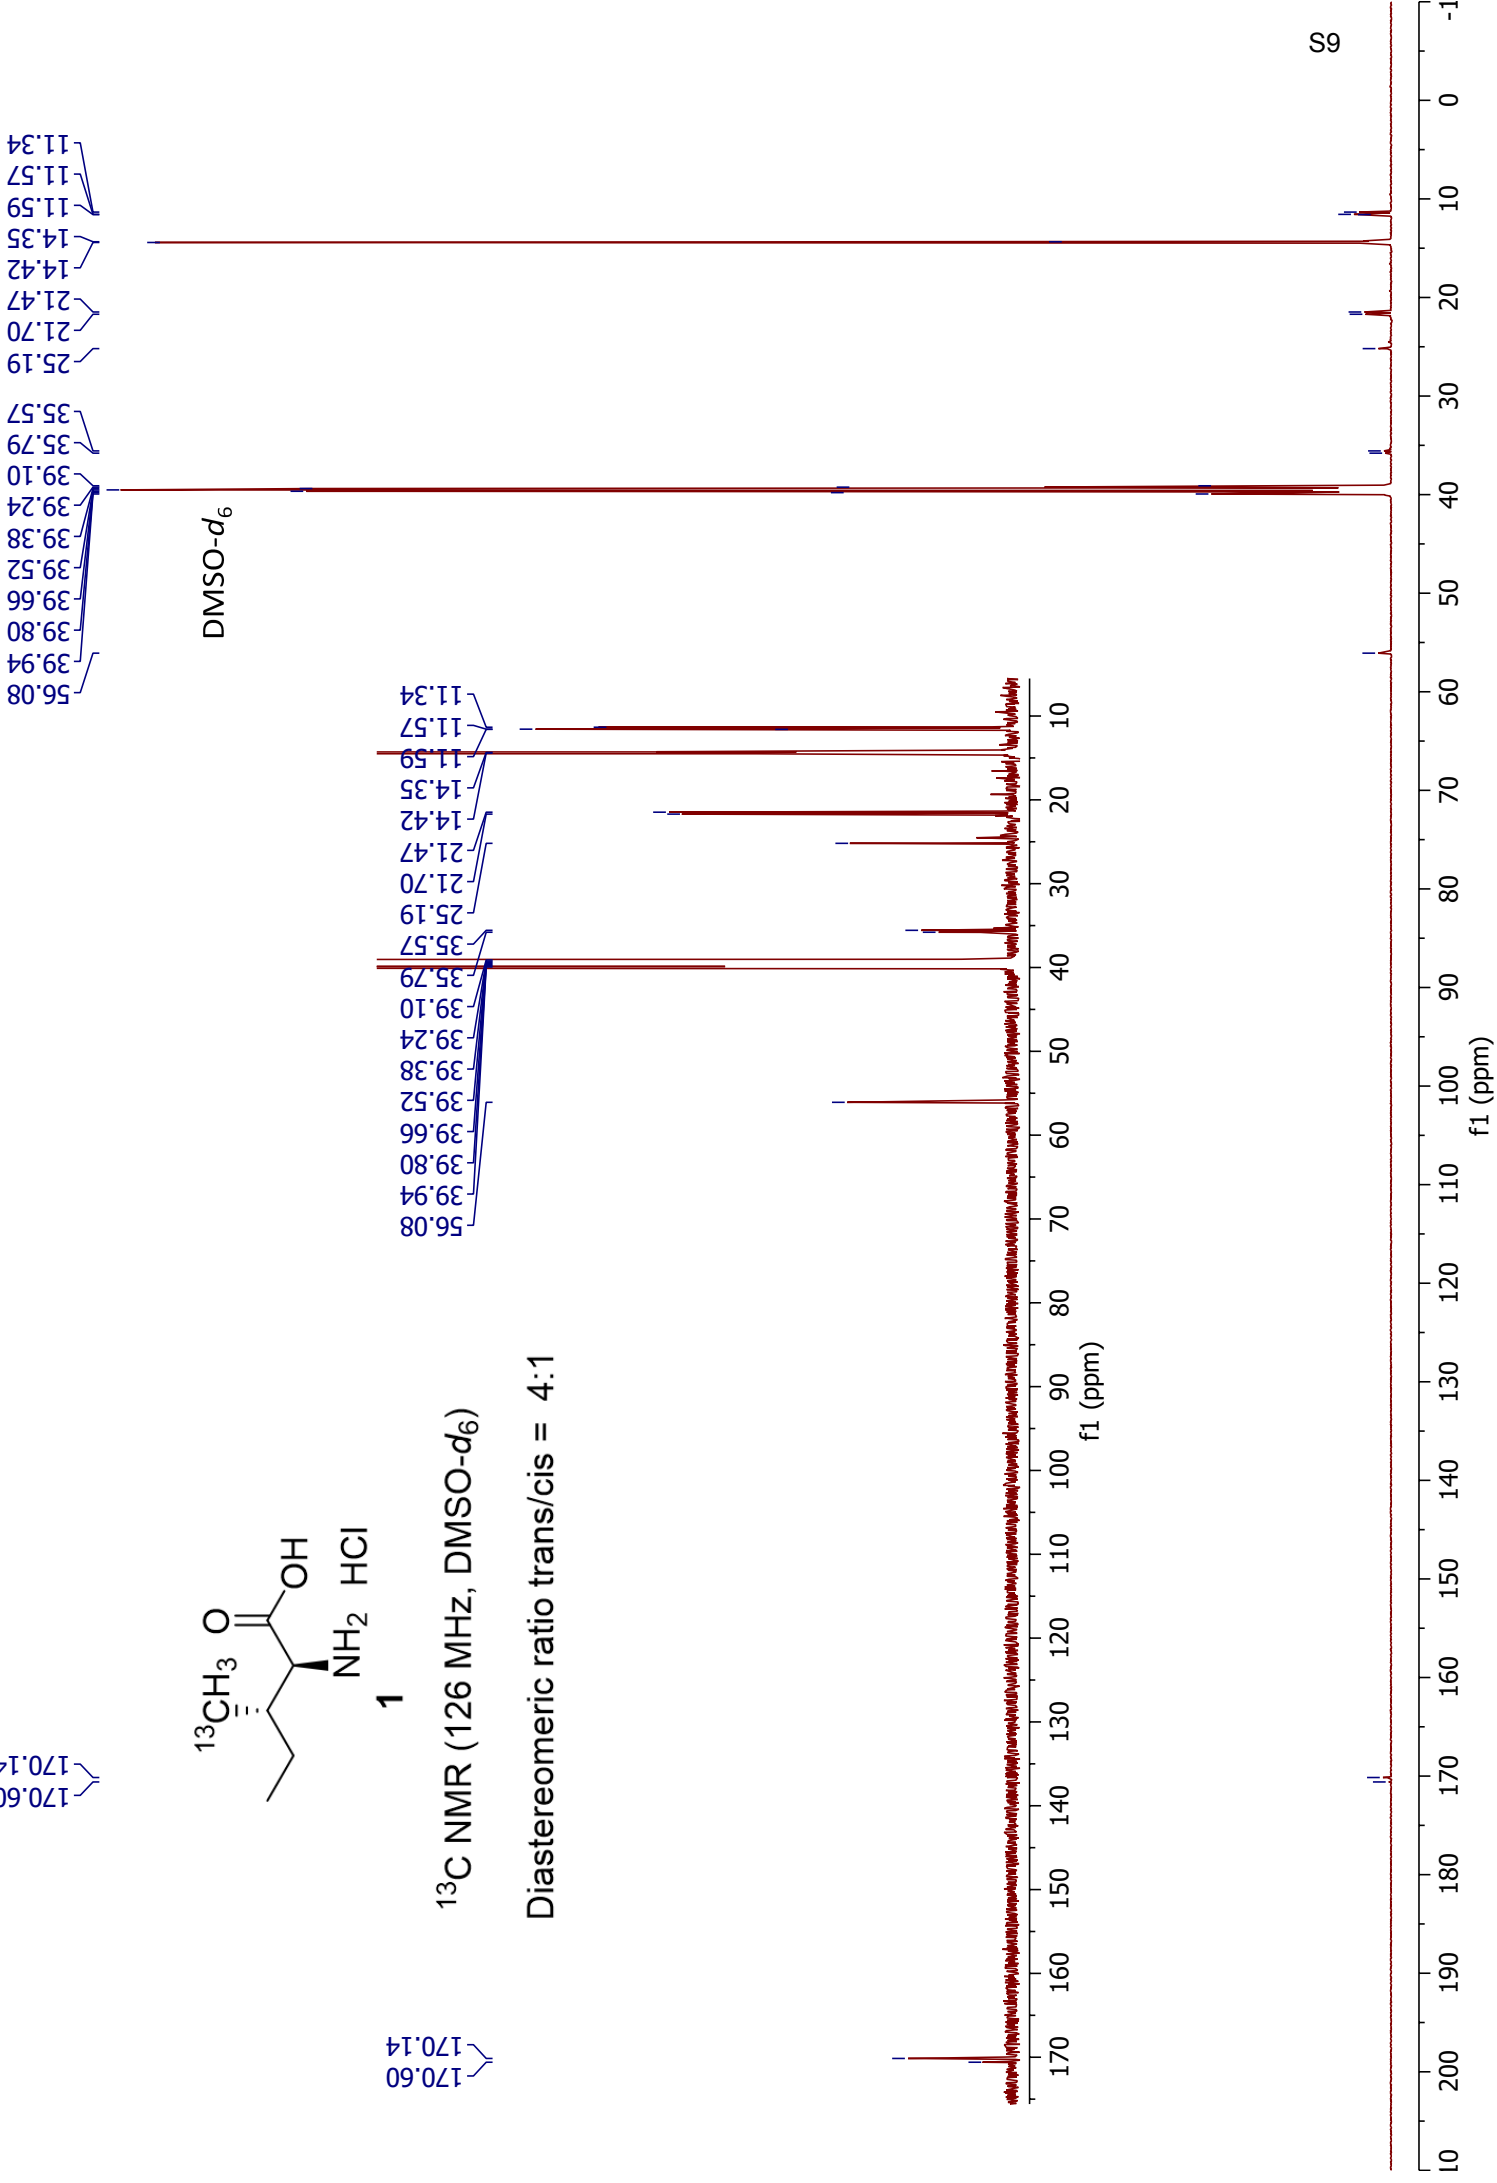



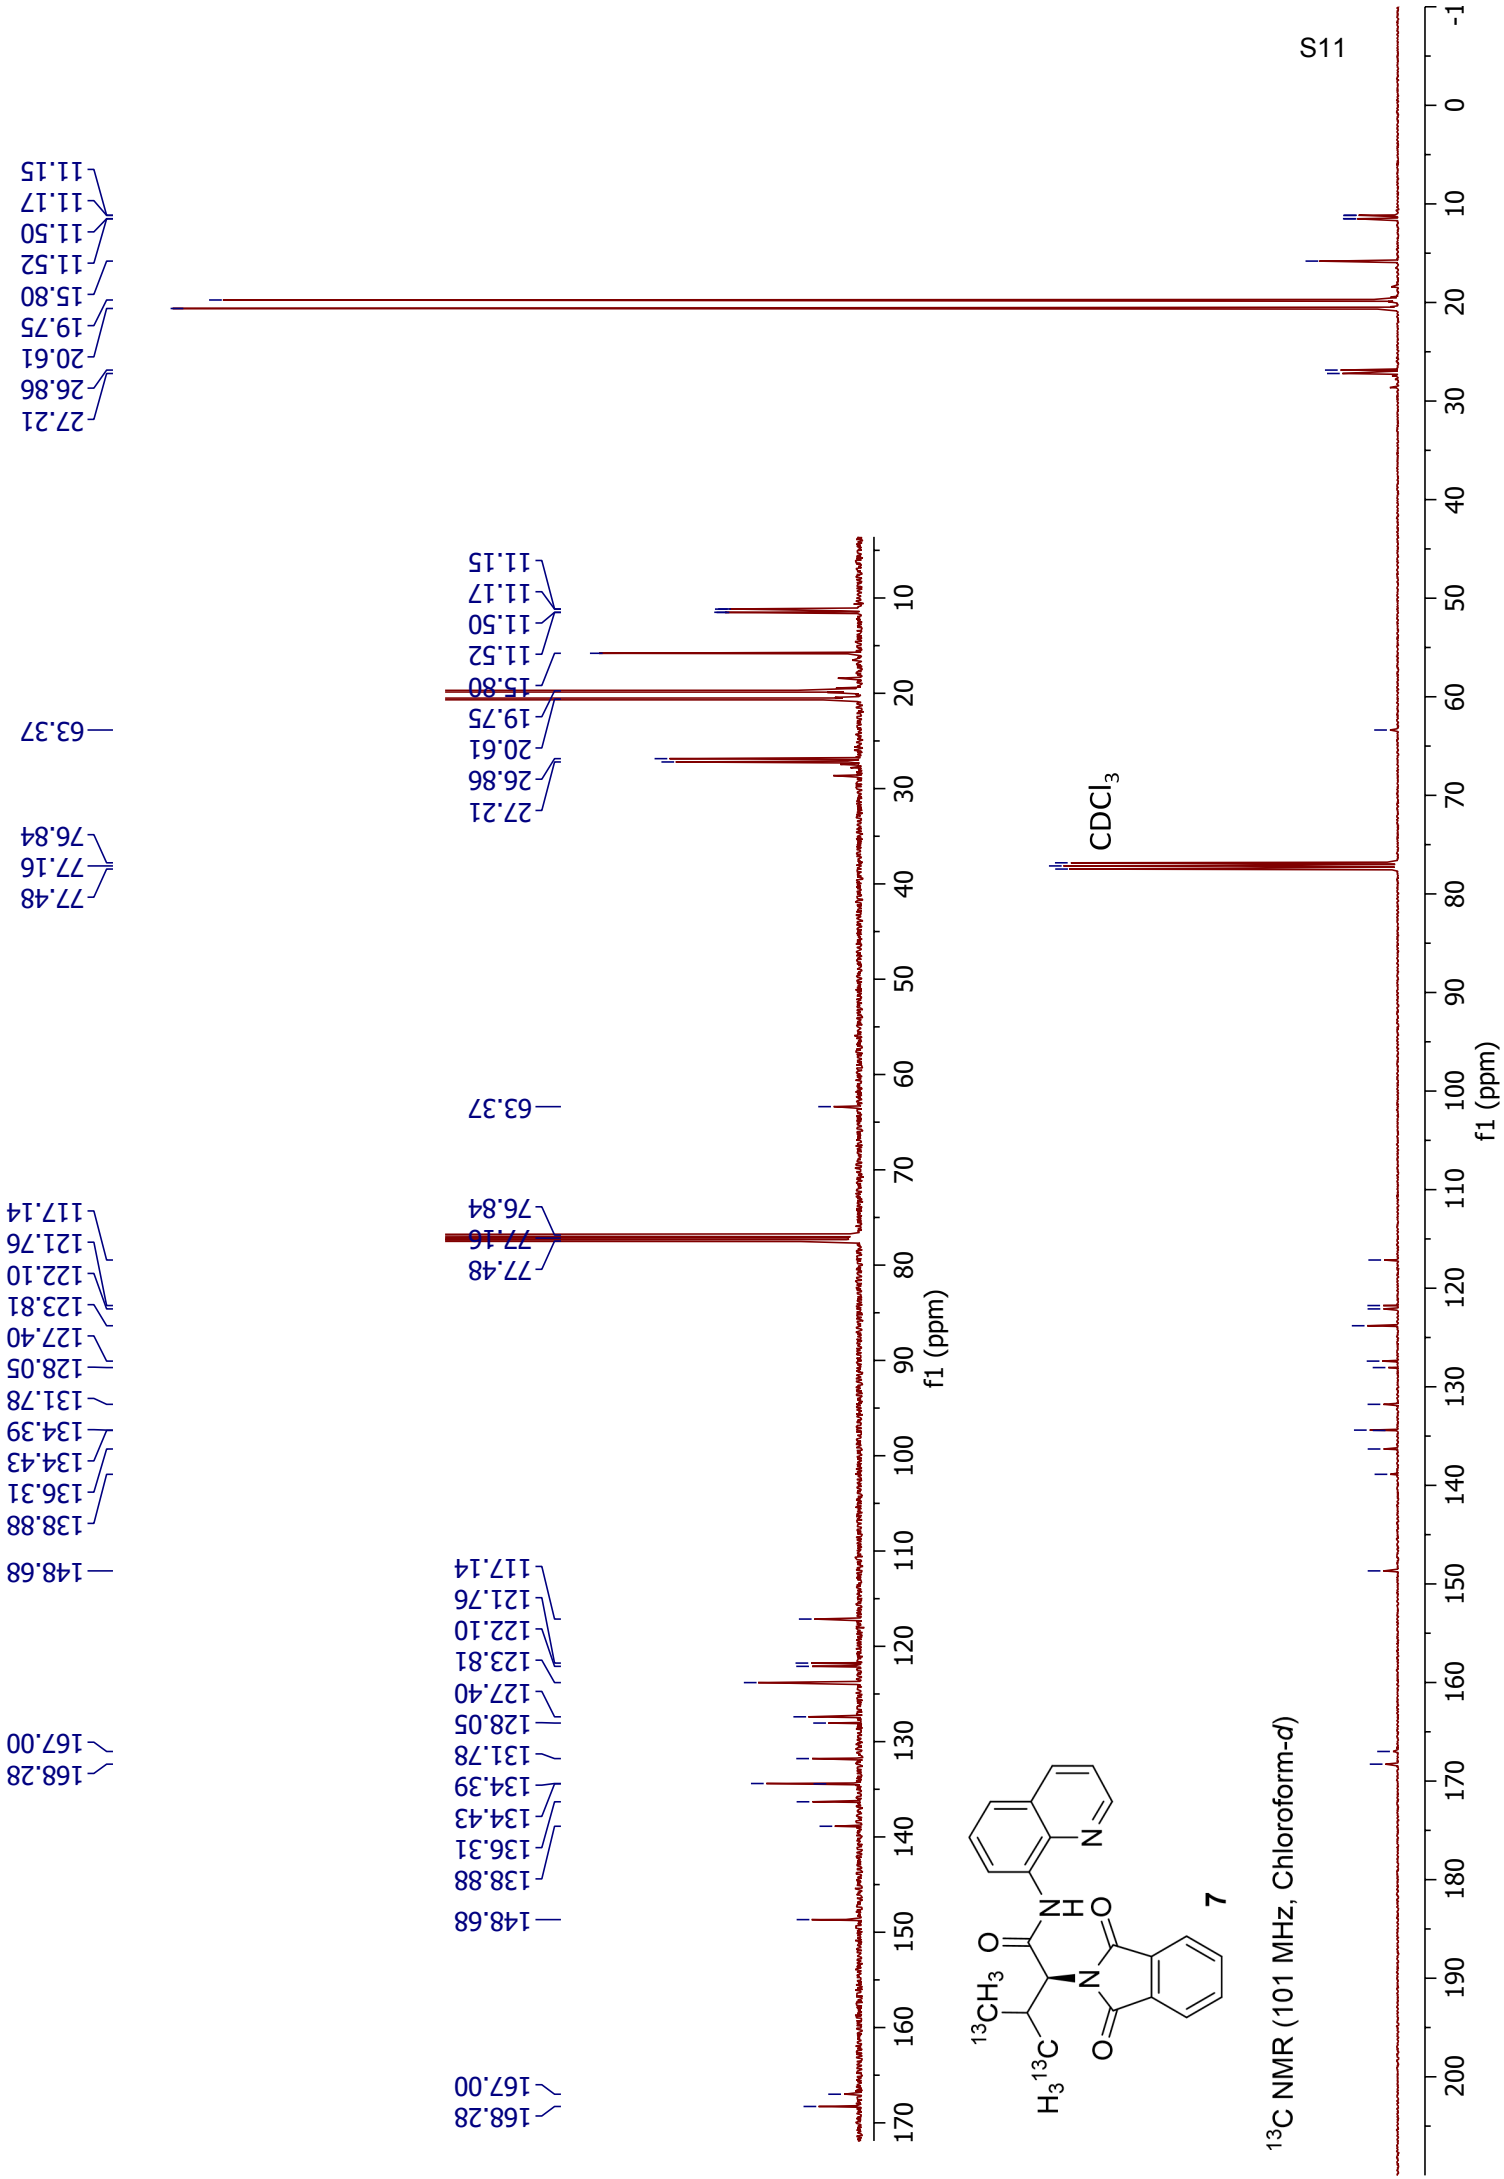



11.08  
11.10  
11.36  
11.38  
15.59  
15.60  
19.26  
20.90  
26.74  
27.02  
39.02  
39.19  
39.35  
39.52  
39.69  
39.85  
40.02  
58.48

123.10  
131.34  
134.48

169.44  
167.65

11.08  
11.10  
11.36  
11.38  
15.59  
15.60  
19.26  
20.90  
26.74  
27.02  
39.02  
39.19  
39.35  
39.52  
39.69  
39.85  
40.02  
58.48

123.10  
131.34  
134.48

169.44  
167.65

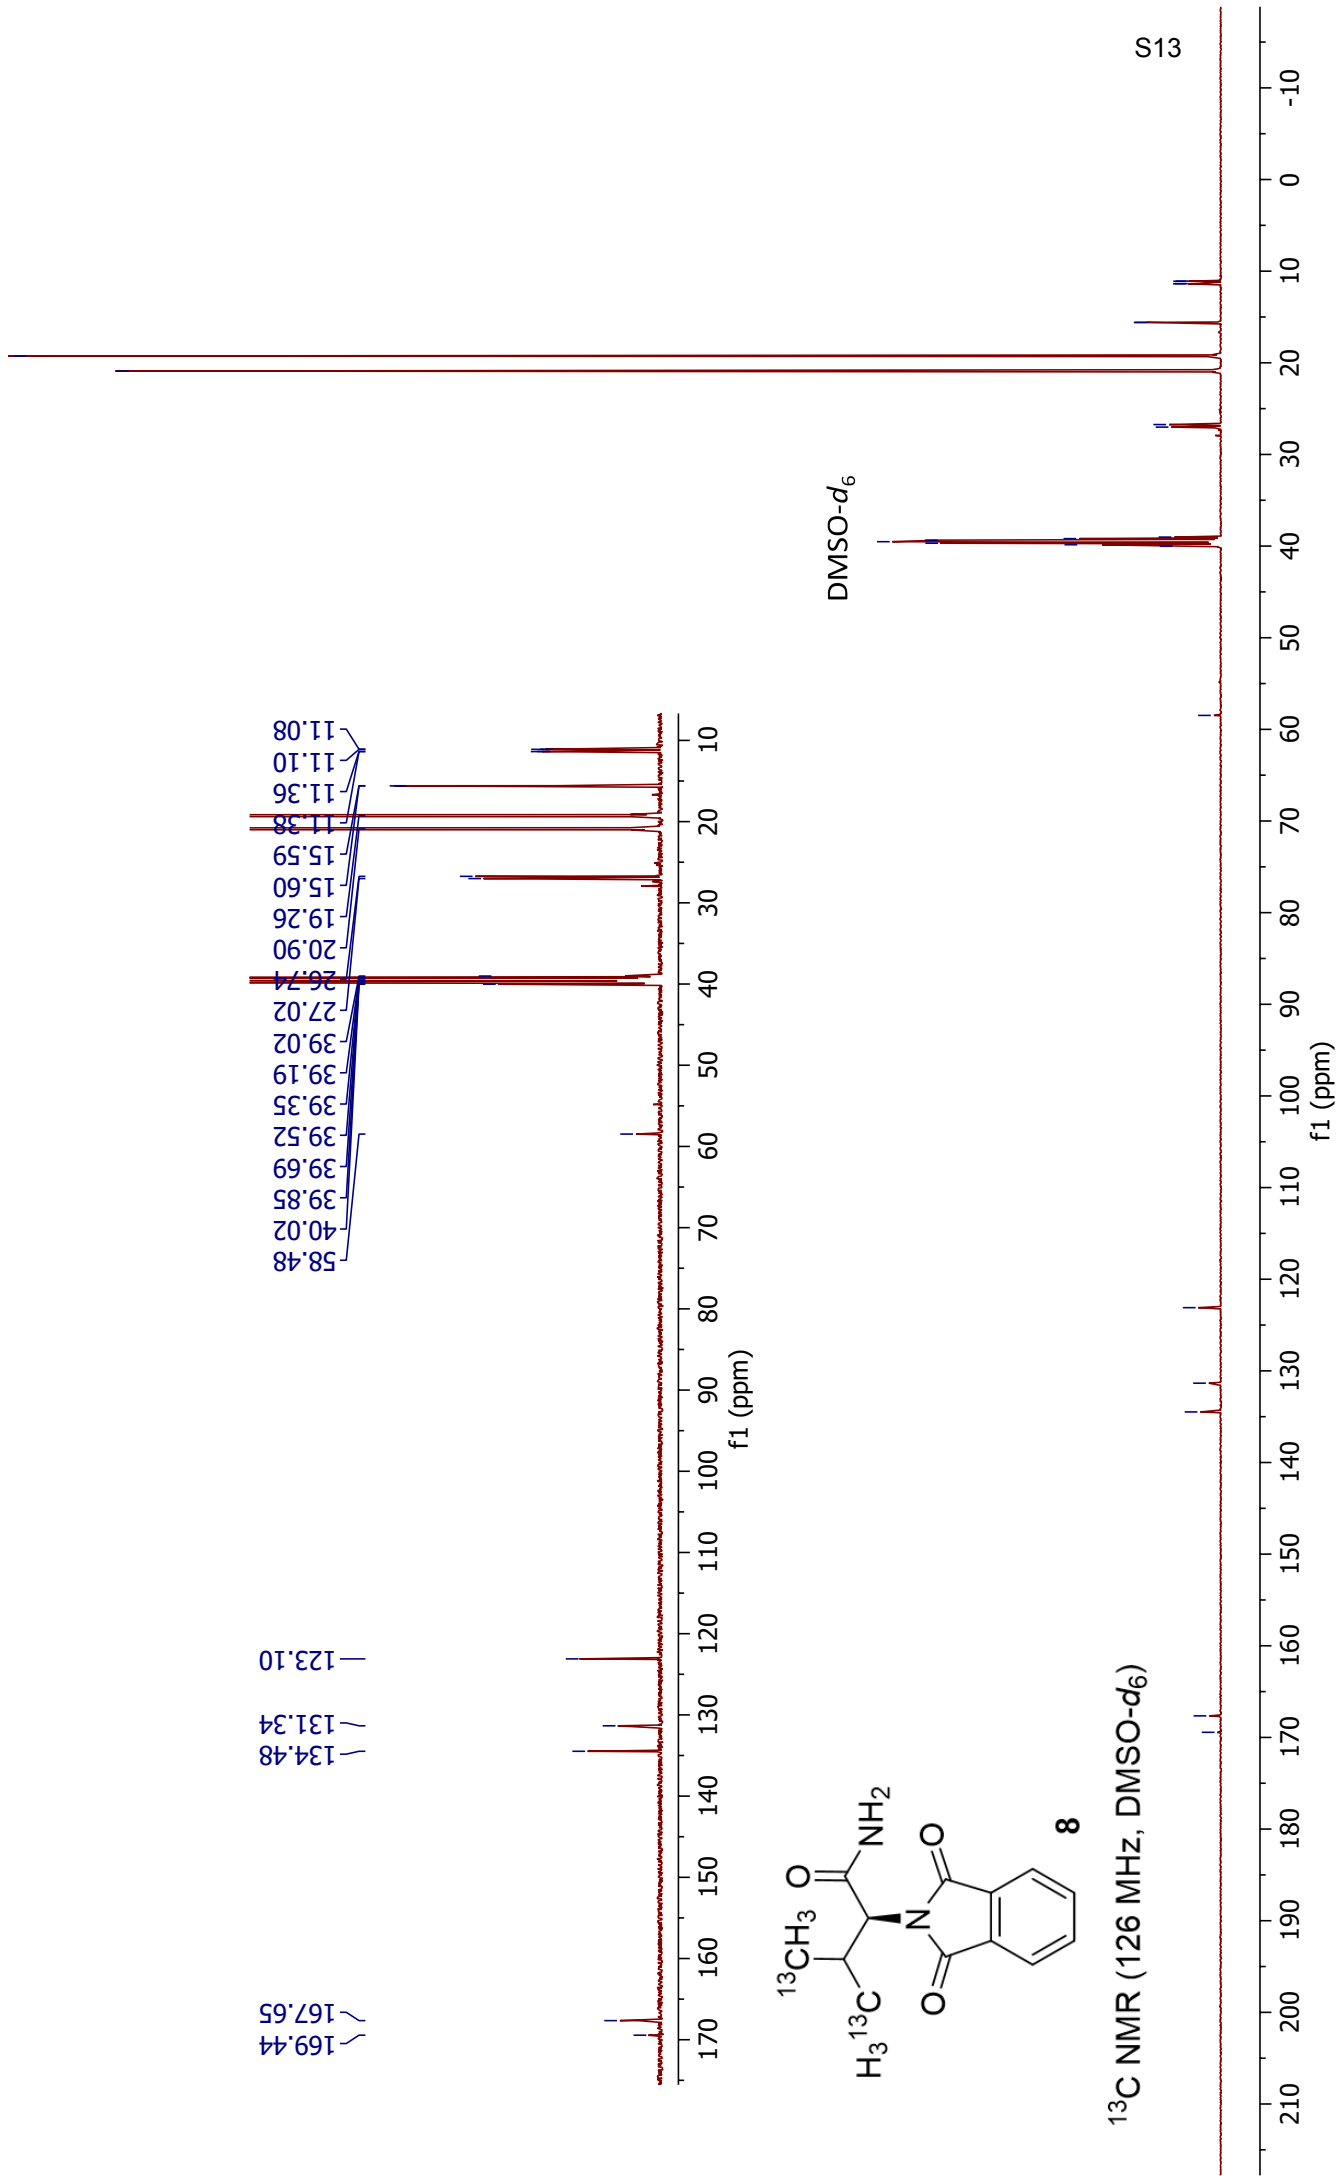

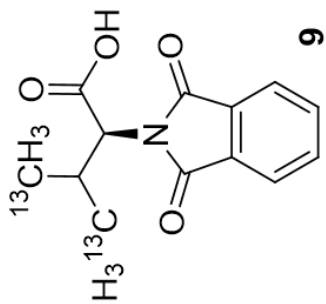

**9**

<sup>1</sup>H NMR (300 MHz, Chloroform-*d*)

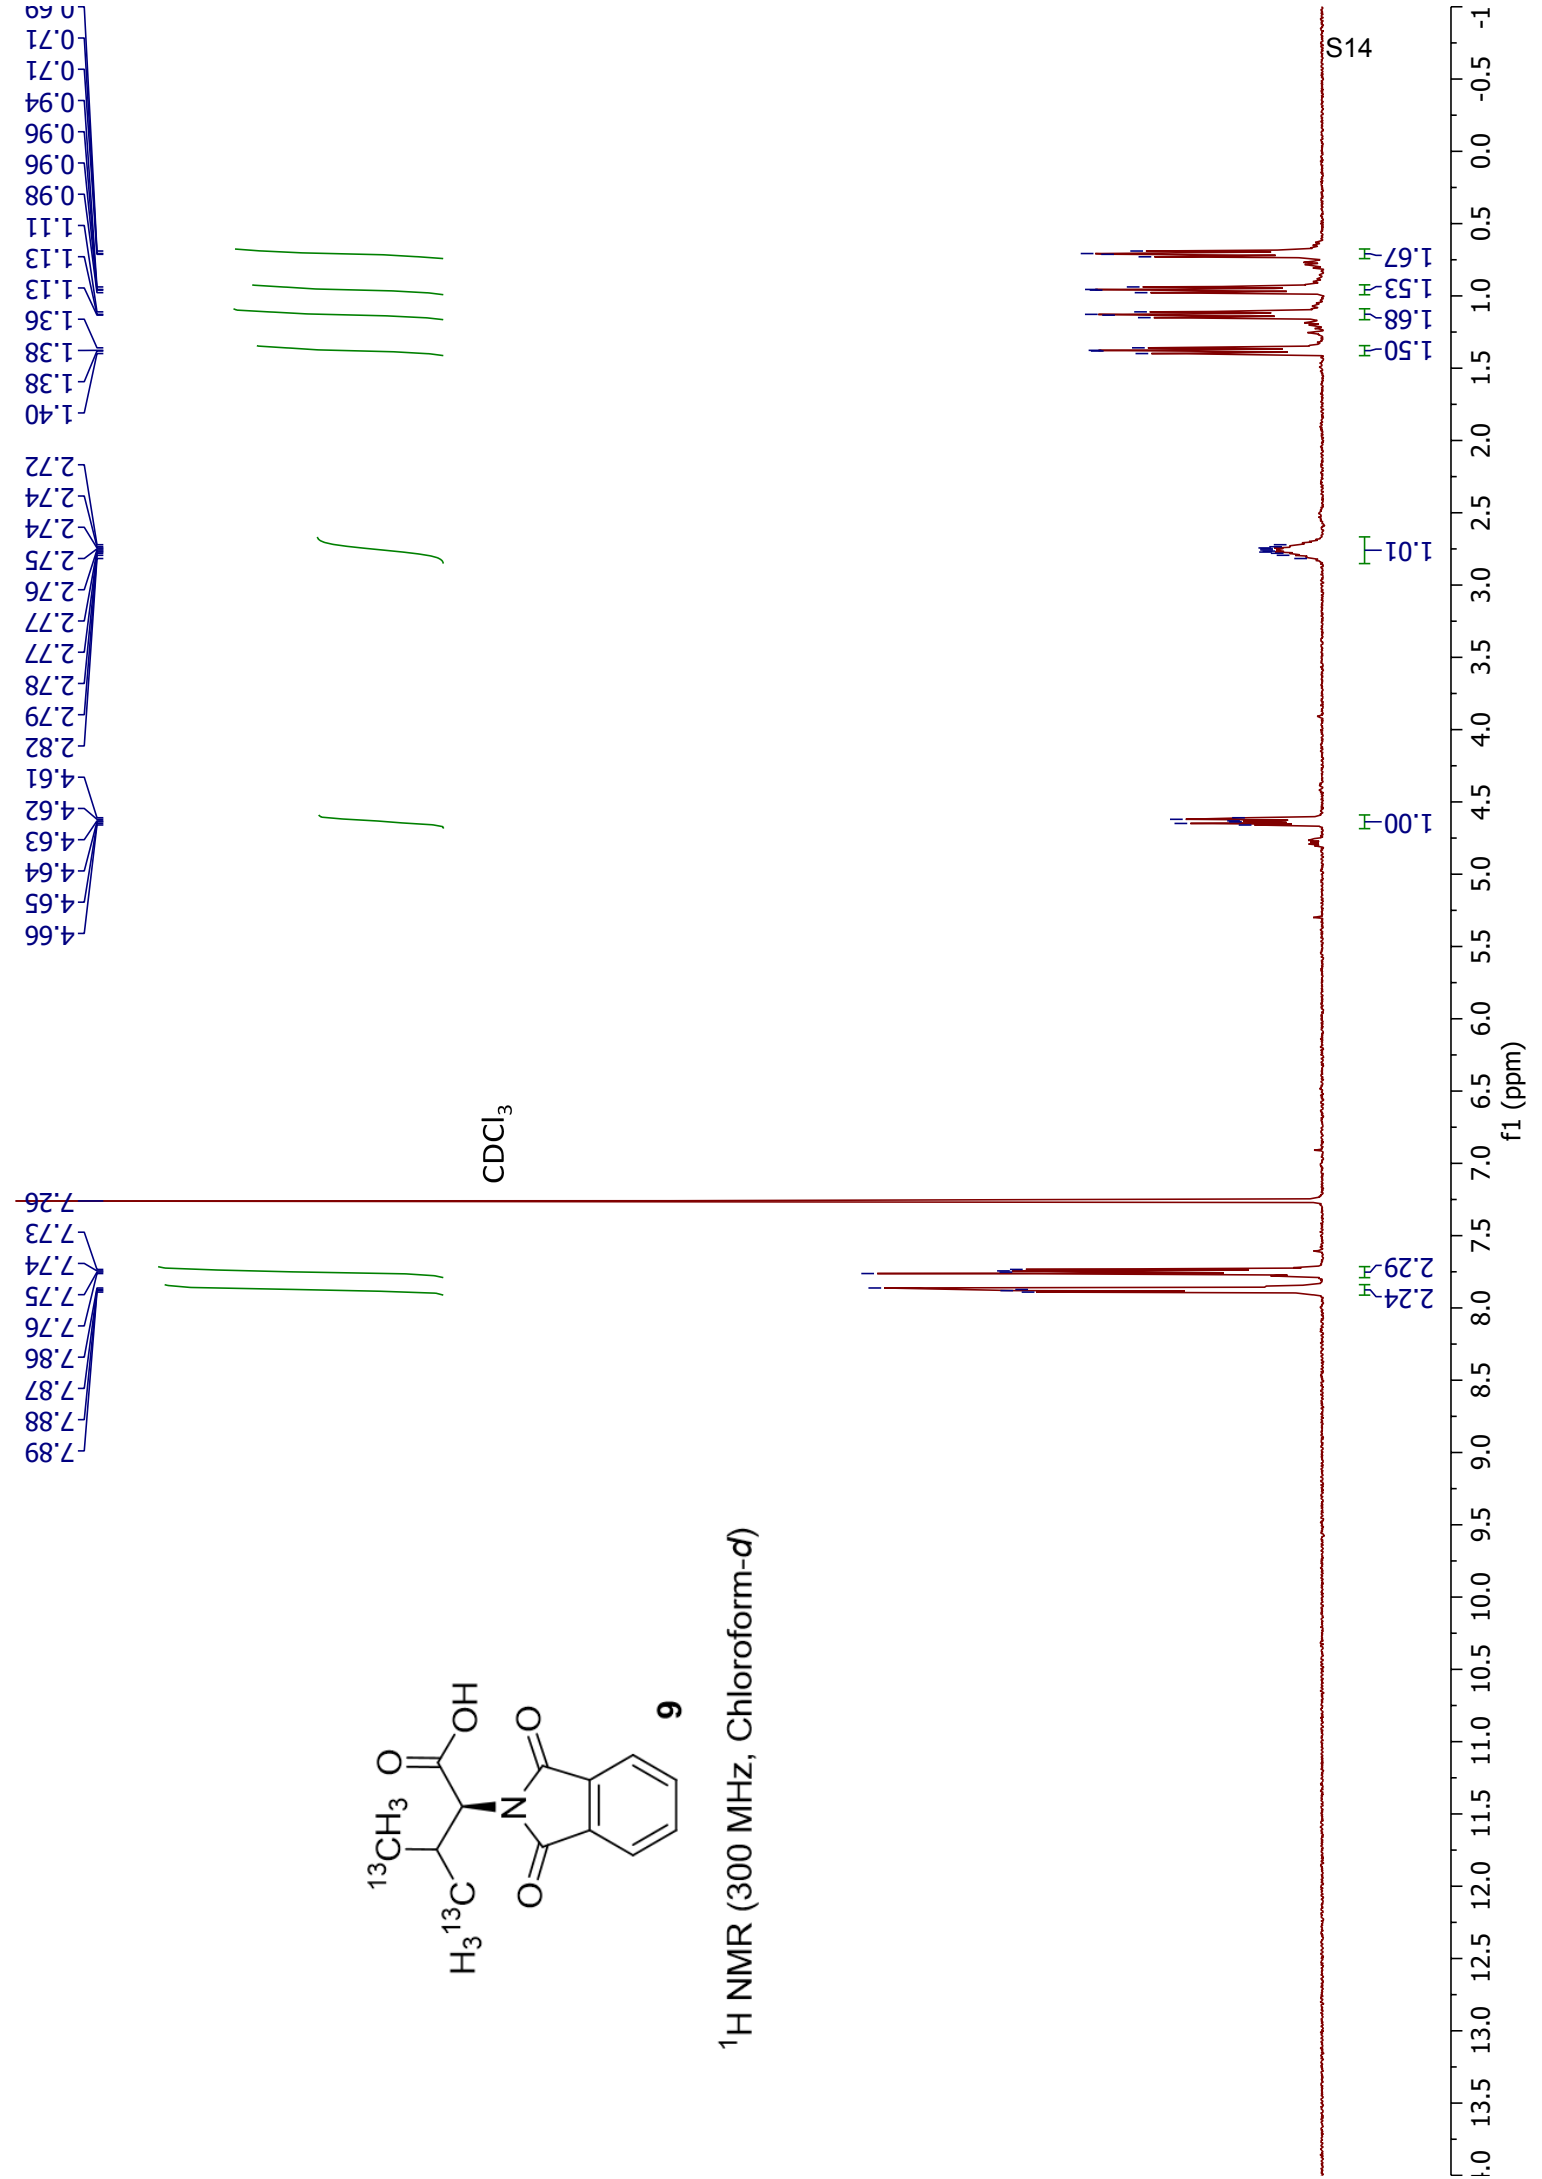

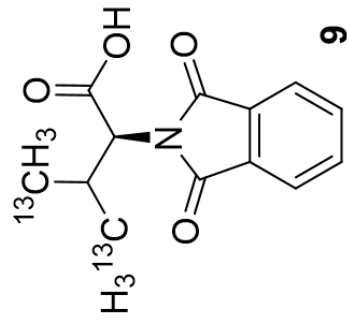

$^{13}\text{C}$  NMR (76 MHz, Chloroform-*d*)

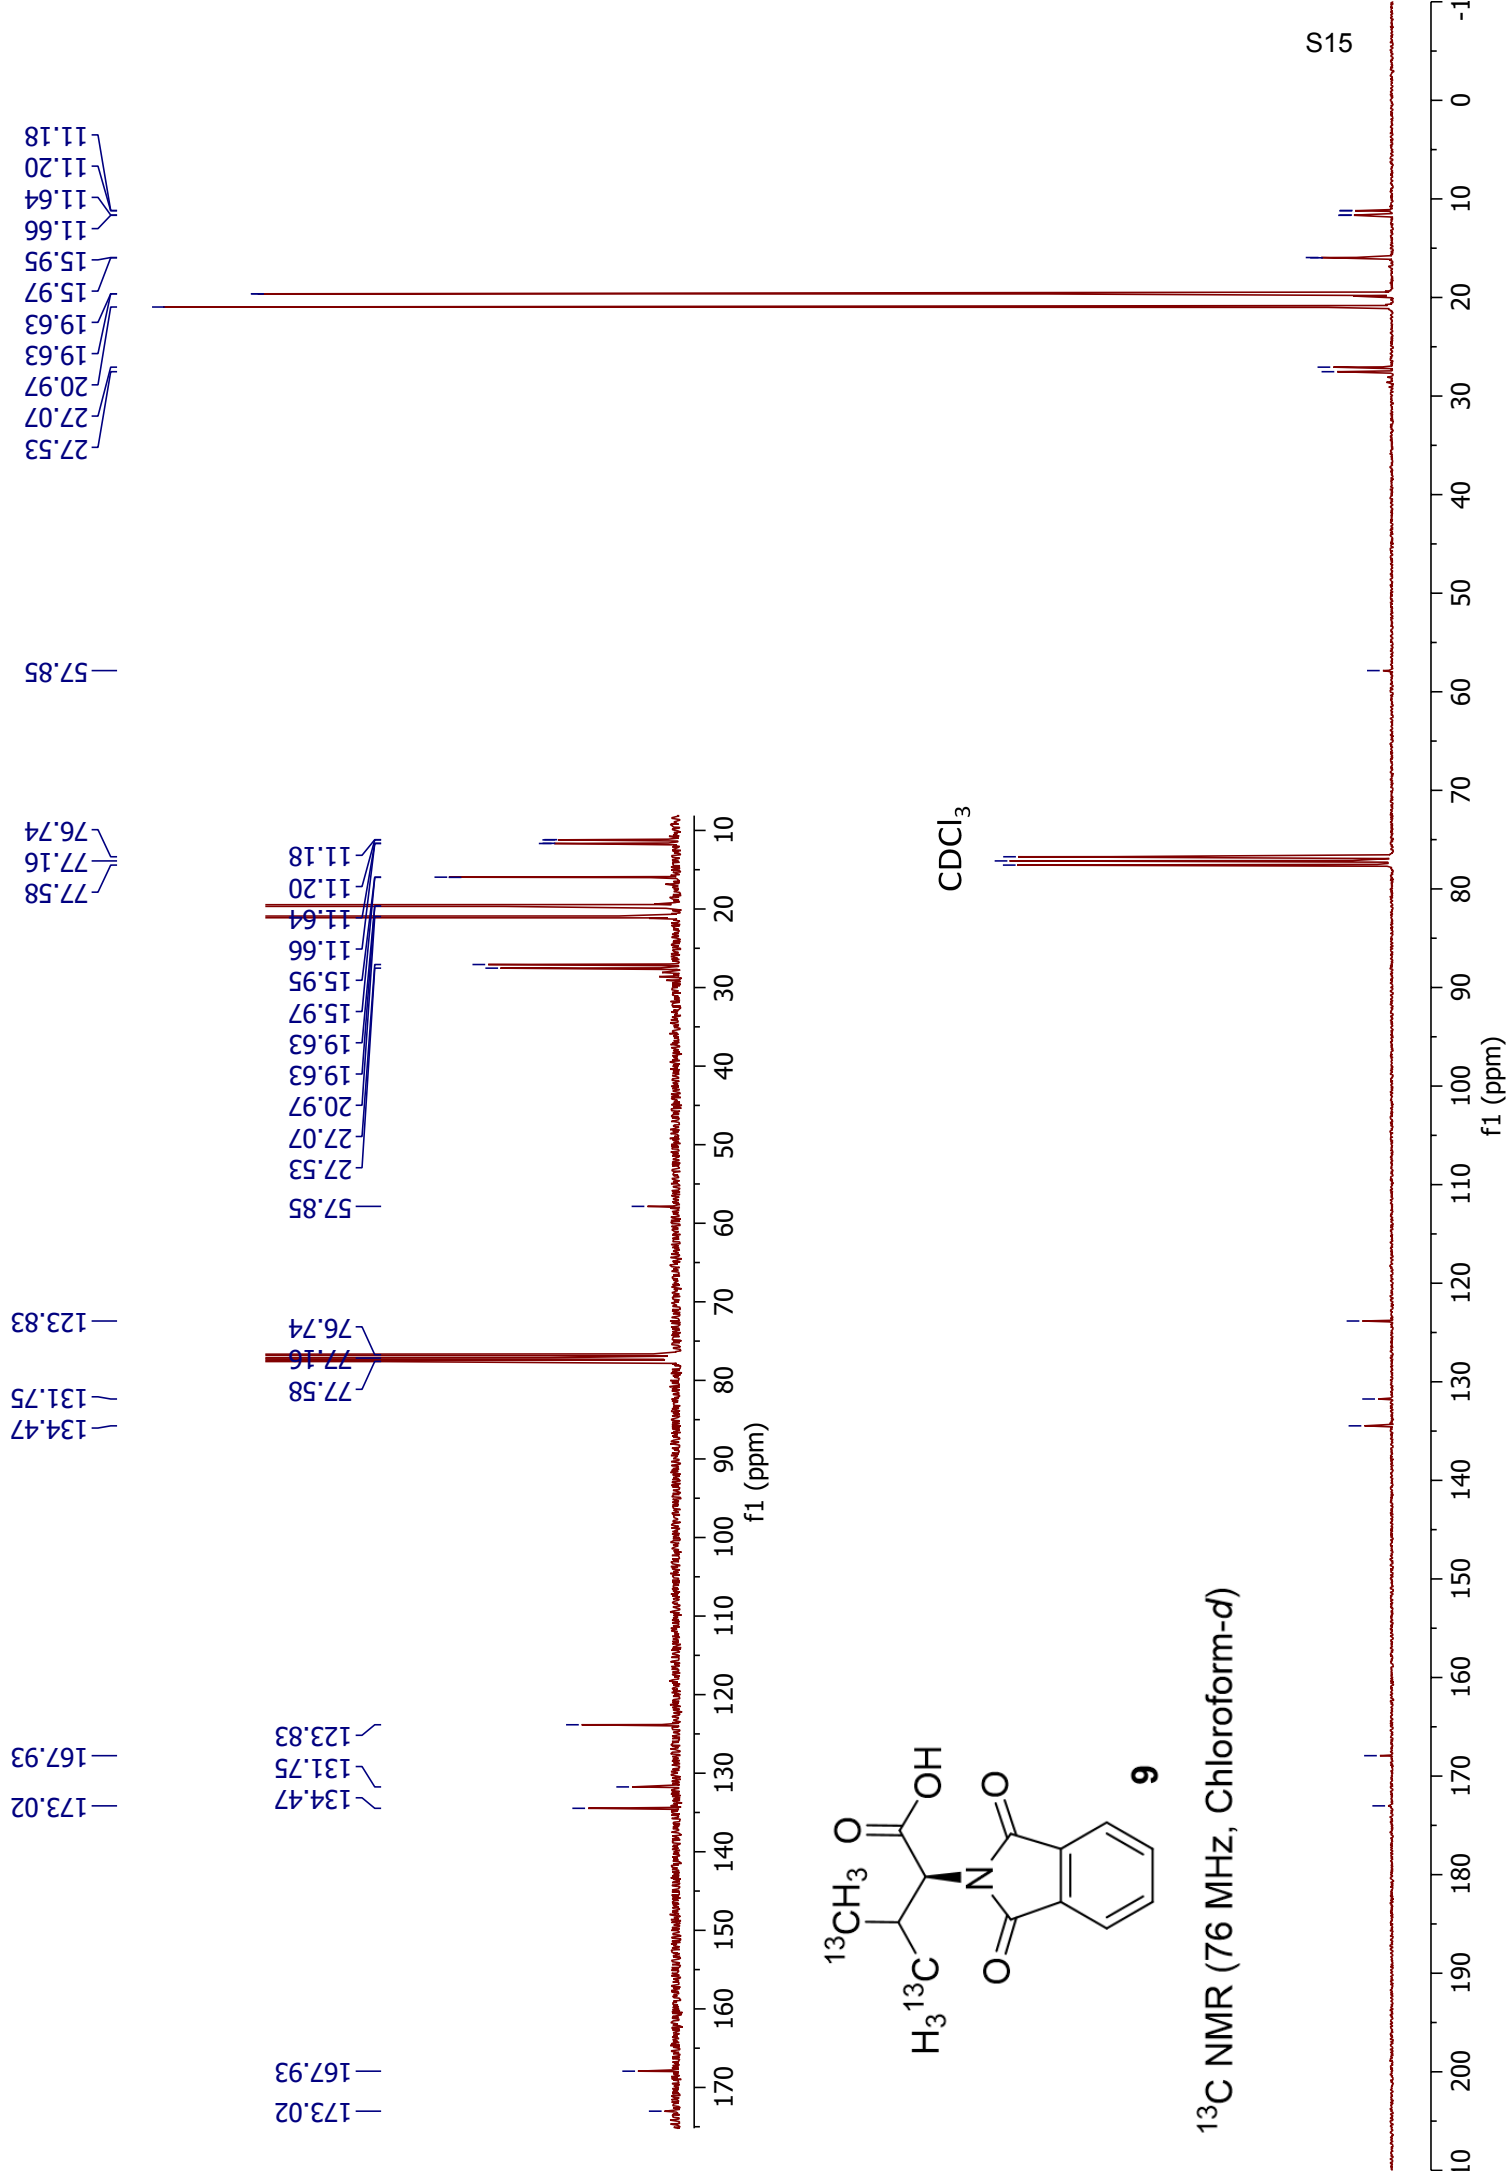

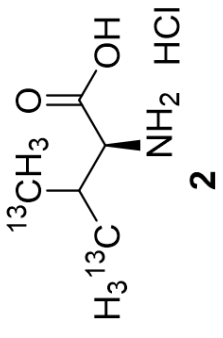

<sup>1</sup>H NMR (500 MHz, DMSO-d<sub>6</sub>)

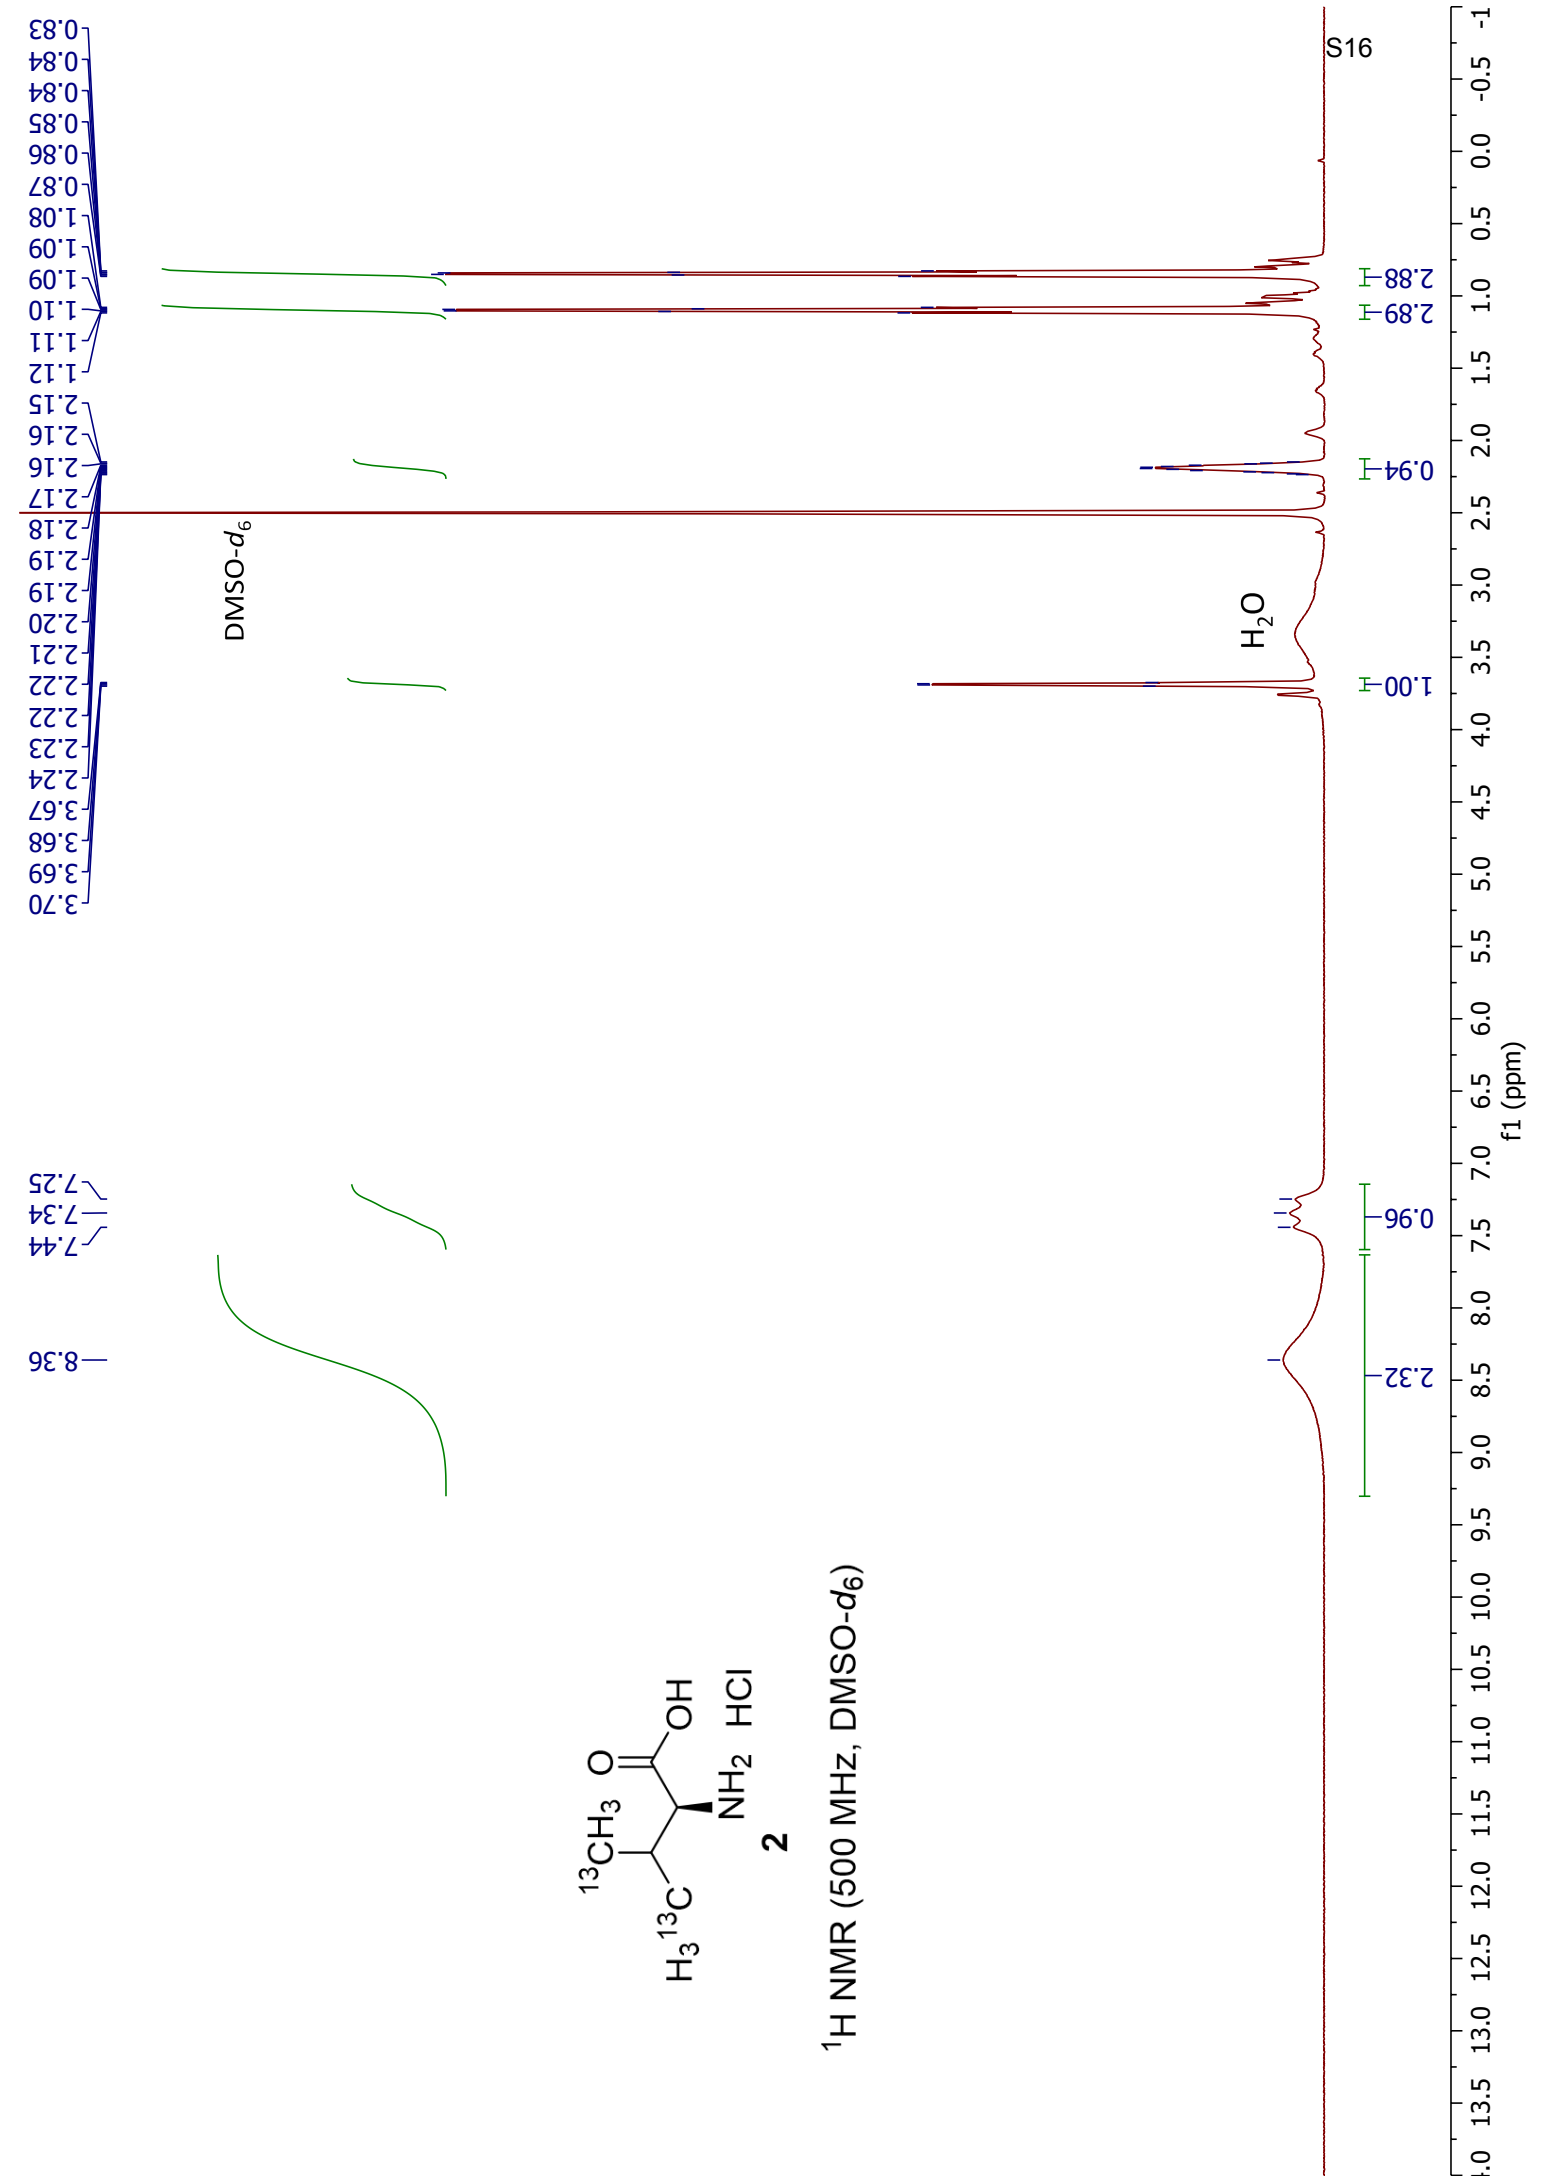



—170.13

11.30  
11.31  
11.57  
11.59  
14.31  
14.33  
17.72  
18.10  
24.37  
24.64  
39.02  
39.19  
39.35  
39.52  
39.69  
39.85  
40.02  
57.37

—170.13

11.30  
11.31  
11.57  
11.59  
14.31  
14.33  
17.72  
18.10  
24.37  
24.64  
39.02  
39.19  
39.35  
39.52  
39.69  
39.85  
40.02  
57.37

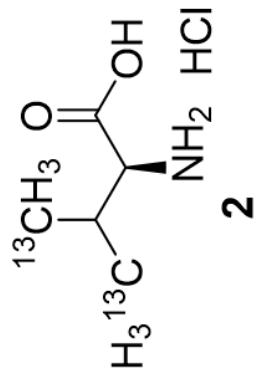

### <sup>13</sup>C NMR (126 MHz, DMSO-d<sub>6</sub>)

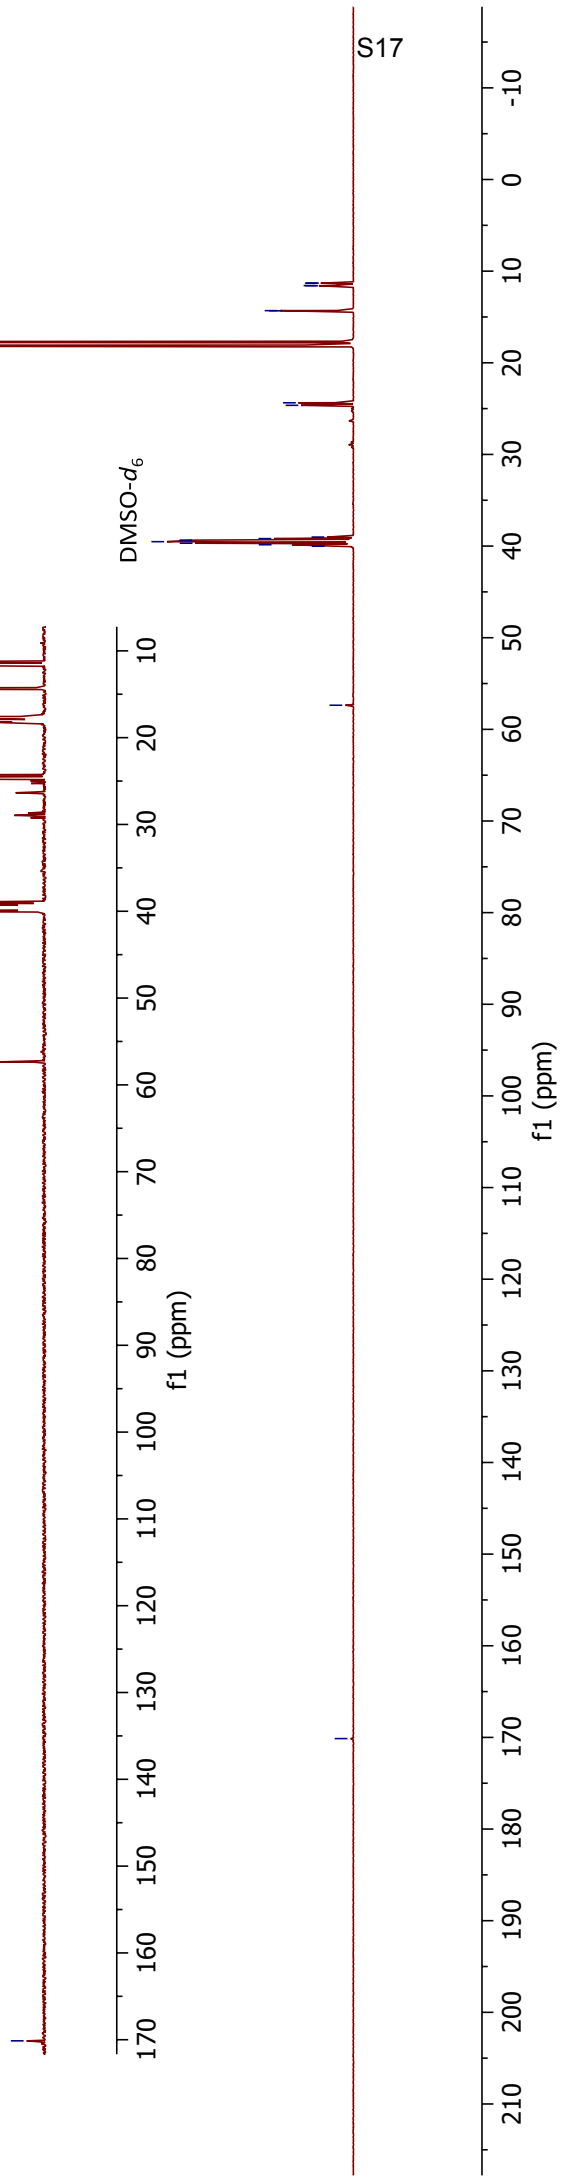

Supplement: d3ob01320k1.pdf [file d3ob01320k1.pdf]
